# Supplementary material for: Solubility, crystallization process optimization, and thermal properties of afoxolaner and the single-crystal structure of its hydrate
Source: Royal Society of Chemistry journal article supplement (doi:10.1039/d4ce00975d), 2024-12-09
Supplement: d4ce00975d1.pdf [file d4ce00975d1.pdf]

***Supporting Information For***  
**Solubility, crystallization process optimization,  
thermal property of Afoxolaner and the single crystal  
structure for its hydrate**

Zong-Bin Fang<sup>a†</sup>, Yue-Feng Xiao<sup>a†</sup>, Xinyao Chen<sup>d</sup>, Lingyu Zhou<sup>d</sup>, Li Chen<sup>b</sup>, Qiaomei  
Lu<sup>c</sup>, Wang-Dong Xiao<sup>a</sup>, Shu-Ting Wu<sup>\*a</sup>

*a. College of Chemistry, Fuzhou University, No.2, Xueyuan Road, Fuzhou,  
Fujian,350108, China.*

*b. College of Biological Science and Engineering, Fuzhou University, No.2, Xueyuan  
Road, Fuzhou, Fujian,350108, China.*

*c. Fujian College Association Instrumental Analysis Center of Fuzhou University,  
Fuzhou, Fujian,350108, China.*

*d. Livzon Group Fuzhou Fuxing Pharmaceutical Co., Ltd.*

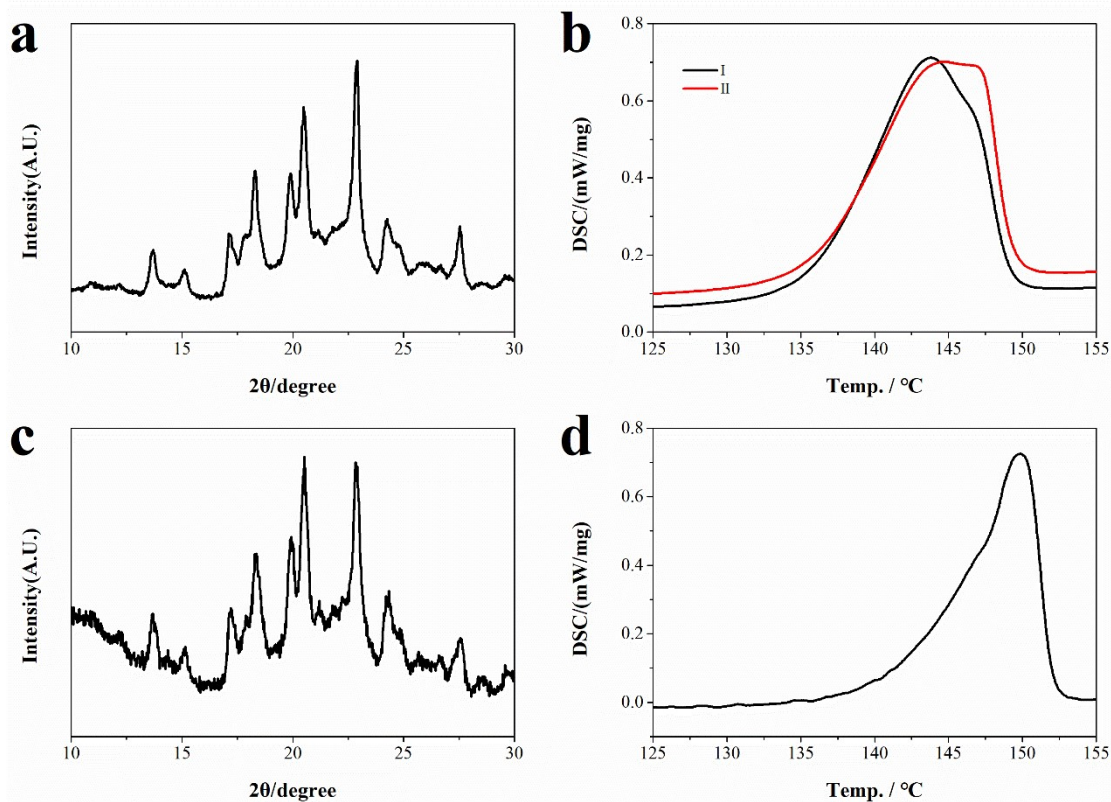

Fig. S1 (a, c) The XRD of starting material (a) and products after crystallization (c). (b, d) The DSC curves of starting material (b) and products after crystallization (d).

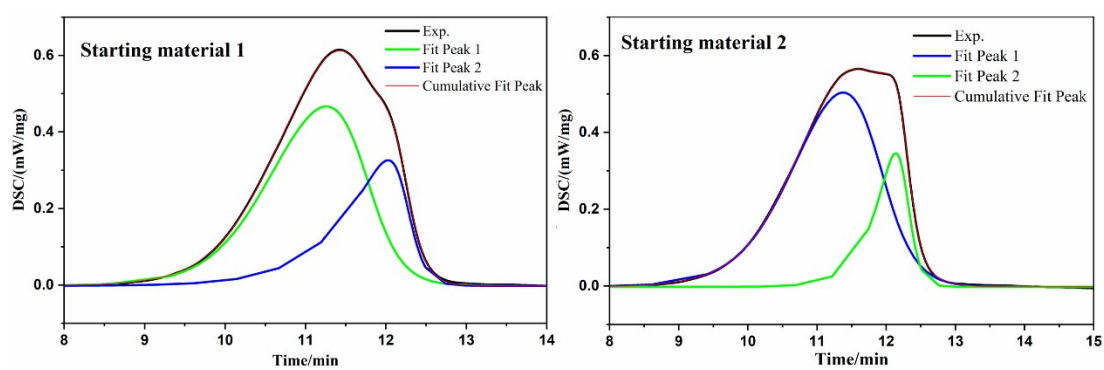

Fig. S2 The DSC curves of starting material was fitted by Asym2sig function. Black lines represent the raw data, colorful lines represent the peak fitting by the Asym2sig function.

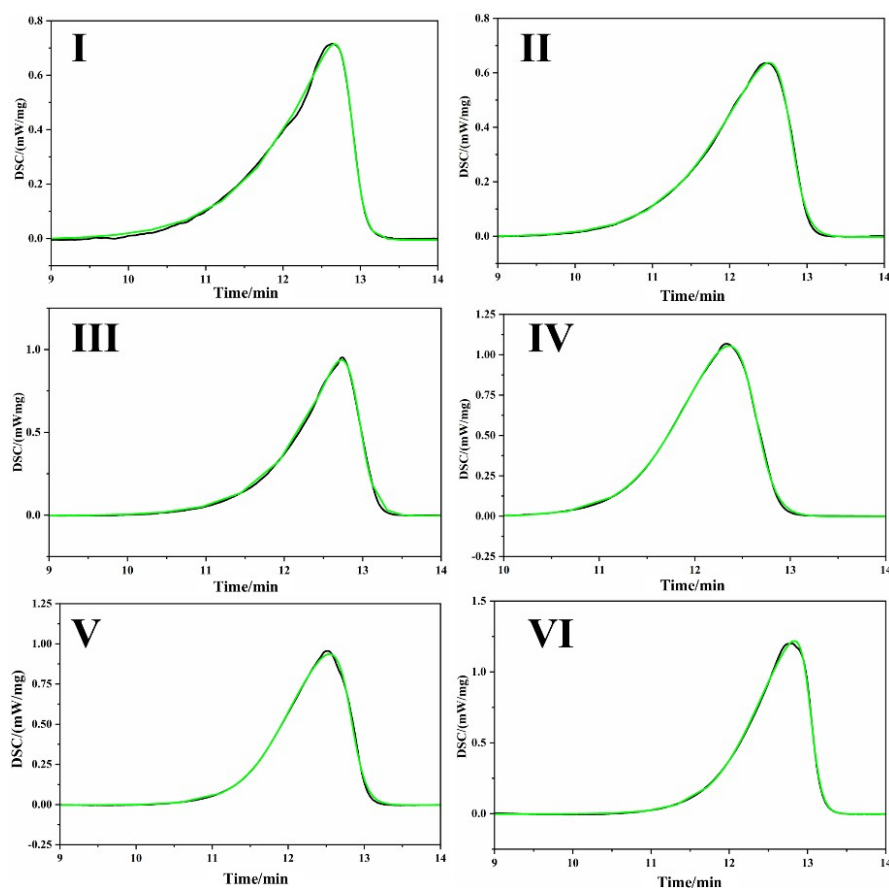

Fig. S3 The DSC curves of the crystal products obtained in the six parallel experiments. Black lines represent the raw data, green lines represent the peak fitting by the Asym2sig function.

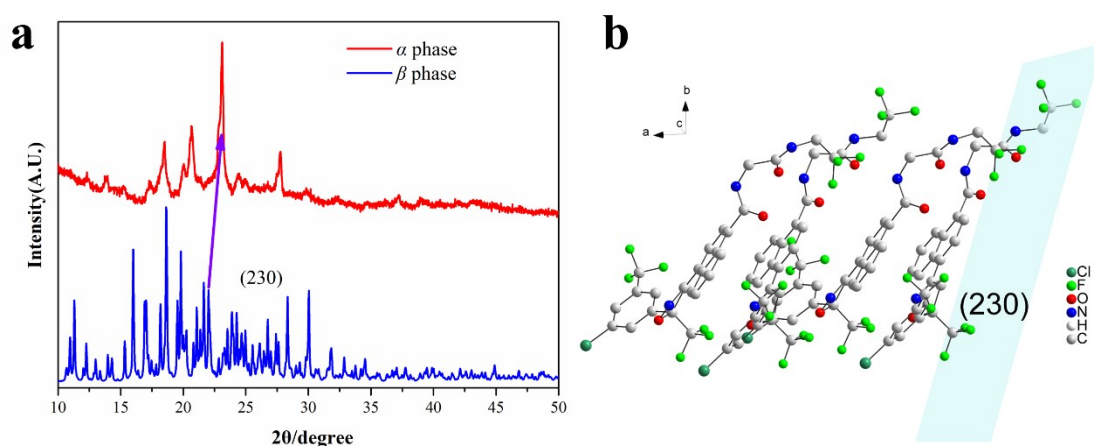

Fig. S4 (a) PXRD patterns of spherical solid ( $\alpha$  phase) and crystal ( $\beta$  phase). (b) The molecular arrangement of (2 3 0) in the  $\beta$  phase. Color scheme is listed in the corner of figure.

Table S1. The solubility (S) of Afoxolaner starting material at 22 °C

| <b>Solvent</b>          | <b>m<sub>1</sub> / g</b> | <b>m<sub>2</sub> / g</b> | <b><math>\bar{S}</math> / mg·g<sup>-1</sup></b> |
|-------------------------|--------------------------|--------------------------|-------------------------------------------------|
| <b>Ethanol</b>          | 4.0781                   | 4.4143                   | <b>82.8(4)</b>                                  |
|                         | 4.0785                   | 4.4150                   |                                                 |
|                         | 4.0748                   | 4.4145                   |                                                 |
| <b>Methanol</b>         | 4.0844                   | 4.7282                   | <b>157.5(4)</b>                                 |
|                         | 4.0855                   | 4.7309                   |                                                 |
|                         | 4.0863                   | 4.7274                   |                                                 |
| <b>Dichloro-methane</b> | 6.8361                   | 6.9671                   | <b>19.2(1)</b>                                  |
|                         | 6.8337                   | 6.9661                   |                                                 |
|                         | 6.8359                   | 6.9660                   |                                                 |
| <b>Acetone</b>          | 4.0748                   | 5.0864                   | <b>248(1)</b>                                   |
|                         | 4.0744                   | 5.0891                   |                                                 |
|                         | 4.0781                   | 5.0822                   |                                                 |
| <b>Water</b>            | 5.1731                   | 5.1624                   | <b>0</b>                                        |
|                         | 5.1738                   | 5.1631                   |                                                 |
|                         | 5.1749                   | 5.1703                   |                                                 |

Table S2. Summary of the endothermic peak data of the starting materials (Raw 1 and Raw 2) and six parallel crystallization solids in the ethanol solution experiments (I ~ VI).

|                                                  | <b>Raw 1</b> | <b>Raw 2</b> | <b>I</b> | <b>II</b> | <b>III</b> | <b>IV</b> | <b>V</b> | <b>VI</b> |
|--------------------------------------------------|--------------|--------------|----------|-----------|------------|-----------|----------|-----------|
| <b>Initial Tem. / °C</b>                         | 128.5        | 128.6        | 134.1    | 131.8     | 135.1      | 137.3     | 136.8    | 139.3     |
| <b>Peak Tem. / °C</b>                            | 143.8        | 144.7        | 149.9    | 149.1     | 150.4      | 148.3     | 149.3    | 150.7     |
| <b>Final Temp. / °C</b>                          | 155.4        | 156.2        | 153.7    | 154.0     | 153.8      | 152.3     | 153.3    | 153.8     |
| <b>Integral area / mW·mg<sup>-1</sup></b>        | 1.063        | 1.057        | 0.8362   | 0.8275    | 0.9337     | 1.046     | 0.9936   | 1.107     |
| <b>Total enthalpy / J·g<sup>-1</sup></b>         | 63.78        | 63.42        | 50.17    | 49.65     | 56.02      | 62.76     | 59.62    | 66.42     |
| <b>Temp. of Fit Peak 1 / °C</b>                  | 143.0        | 143.6        | 150.0    | 149.2     | 150.3      | 148.5     | 149.4    | 150.8     |
| <b>Temp. of Fit Peak 2 / °C</b>                  | 146.8        | 147.4        | /        | /         | /          | /         | /        | /         |
| <b>Area of Fit peak 1 / mW·mg<sup>-1</sup></b>   | 0.7237       | 0.8391       | 0.8698   | 0.8153    | 0.9539     | 1.081     | 1.000    | 1.120     |
| <b>Enthalpy of Fit peak 1 / J·g<sup>-1</sup></b> | 43.42        | 50.35        | 52.19    | 48.92     | 57.23      | 64.86     | 60.00    | 67.20     |
| <b>Area of Fit peak 2 / mW·mg<sup>-1</sup></b>   | 0.3503       | 0.2293       | /        | /         | /          | /         | /        | /         |
| <b>Enthalpy of Fit peak 2 / J·g<sup>-1</sup></b> | 21.02        | 13.76        | /        | /         | /          | /         | /        | /         |
| <b>R<sup>2</sup></b>                             | 0.9999       | 0.9999       | 0.9982   | 0.9995    | 0.9996     | 0.9997    | 0.9992   | 0.9994    |

Table S3. Comparison of the 2 $\theta$ /° in the XRD diffraction peaks of  $\alpha$  phase and Form B in literature (Patent: WO2011149749A1).

| <b><math>\alpha</math> phase</b> | <b>Form B</b> |
|----------------------------------|---------------|
| 13.88                            |               |
| 15.37                            |               |
| 17.40                            | 17.43         |
| 18.11                            |               |
| 18.53                            | 18.59         |
| 20.13                            | 20.21         |
| 20.74                            | 20.79         |
| 21.40                            | 21.41         |
|                                  | 22.11         |
| 23.05                            | 23.18         |
| 24.39                            |               |
| 24.55                            | 24.57         |
| 26.78                            |               |
| 27.79                            | 27.84         |
| 29.80                            |               |

Table S4. The Miller index of peaks in PXRD of the  $\beta$  phase.

| <b>2<math>\theta</math>(deg)</b> | <b>(<i>h, k, l</i>)</b> | <b>2<math>\theta</math>(deg)</b> | <b>(<i>h, k, l</i>)</b> | <b>2<math>\theta</math>(deg)</b> | <b>(<i>h, k, l</i>)</b> |
|----------------------------------|-------------------------|----------------------------------|-------------------------|----------------------------------|-------------------------|
| 5.846                            | (0,1,1)                 | 17.049                           | (1,3,2)                 | 23.538                           | (0,4,4)                 |
| 8.892                            | (0,3,1)                 | 17.599                           | (0,3,3)                 | 23.913                           | (2,4,1)                 |
| 9.472                            | (0,4,0)                 | 18.178                           | (1,4,2)                 | 24.662                           | (2,2,2)                 |
| 10.961                           | (0,1,2)                 | 18.643                           | (-1,1,3)                | 24.751                           | (1,1,4)                 |
| 11.401                           | (1,2,0)                 | 19.538                           | (1,5,2)                 | 25.668                           | (1,3,4)                 |
| 12.259                           | (1,1,1)                 | 19.828                           | (-1,3,3)                | 26.754                           | (2,7,0)                 |
| 12.931                           | (1,2,1)                 | 20.398                           | (1,2,3)                 | 27.416                           | (1,5,4)                 |
| 13.36                            | (1,3,-1)                | 20.819                           | (2,0,0)                 | 27.62                            | (2,7,1)                 |
| 15.331                           | (1,4,1)                 | 21.087                           | (1,3,3)                 | 28.174                           | (2,6,2)                 |
| 15.662                           | (1,1,2)                 | 21.362                           | (2,2,0)                 | 28.337                           | (2,8,0)                 |
| 15.991                           | (0,5,2)                 | 21.642                           | (2,2,-1)                | 30.04                            | (2,9,0)                 |
| 16.018                           | (-1,3,2)                | 22.017                           | (1,4,3)                 | 31.345                           | (2,1,4)                 |
| 16.772                           | (0,2,3)                 | 22.023                           | (2,3,0)                 | 31.6                             | (3,1,-1)                |
| 16.914                           | (1,5,1)                 | 22.423                           | (2,2,1)                 | 36.91                            | (2,4,5)                 |

Table S5. Fractional Atomic Coordinates ( $\times 10^4$ ) and Equivalent Isotropic

Displacement Parameters ( $\text{\AA}^2 \times 10^3$ ).  $U_{\text{eq}}$  is defined as 1/3 of of the trace of the orthogonalised  $U_{ij}$  tensor.

| Atom | x           | y          | z           | $U_{\text{eq}}$ |
|------|-------------|------------|-------------|-----------------|
| Cl01 | -2741.7(19) | 64.8(5)    | 11911.5(11) | 76.3(5)         |
| F301 | 804(8)      | 938(2)     | 13886(3)    | 141(2)          |
| F302 | 1867(11)    | 1296(3)    | 13092(4)    | 205(5)          |
| F303 | -492(9)     | 1324.3(18) | 13210(4)    | 141(2)          |
| F304 | 2956(17)    | 76(5)      | 10856(11)   | 97(5)           |
| F305 | 4291(18)    | 405(5)     | 10092(11)   | 95(5)           |
| F306 | 4150(20)    | 498(5)     | 11402(9)    | 91(5)           |
| F307 | 9479(10)    | 3235(2)    | 8176(4)     | 90(2)           |
| F308 | 11721(10)   | 3236(4)    | 7672(7)     | 157(6)          |
| F309 | 9690(8)     | 3483(2)    | 7024(5)     | 94(2)           |
| F351 | 3977(16)    | 364(3)     | 11118(6)    | 64(3)           |
| F352 | 3857(15)    | 301(3)     | 9831(7)     | 64(3)           |
| F353 | 2413(12)    | -18(2)     | 10528(6)    | 61(2)           |
| F354 | 9980(20)    | 2436(6)    | 6944(14)    | 174(6)          |
| F355 | 11702(16)   | 2823(7)    | 6772(13)    | 179(6)          |
| F356 | 9674(19)    | 2746(6)    | 5848(11)    | 160(5)          |
| O301 | 1090(20)    | 500(6)     | 9821(12)    | 67(5)           |
| O302 | 5669(12)    | 2086(4)    | 6954(9)     | 68(3)           |
| O303 | 7475(12)    | 2713(6)    | 8267(7)     | 97(5)           |
| O351 | 686(18)     | 506(4)     | 9650(9)     | 51(3)           |
| O352 | 6101(10)    | 1889(2)    | 6747(4)     | 54.0(17)        |
| O353 | 7939(10)    | 2510(2)    | 8075(4)     | 53.1(19)        |
| N301 | 1440(30)    | 727(10)    | 9127(15)    | 60(6)           |
| N302 | 4488(13)    | 2444(4)    | 7723(8)     | 54(3)           |
| N303 | 7803(18)    | 2906(6)    | 6957(11)    | 90(5)           |
| N351 | 1090(20)    | 703(5)     | 8981(13)    | 50(4)           |

---

|      |           |           |           |          |
|------|-----------|-----------|-----------|----------|
| N352 | 4983(16)  | 2297(4)   | 7484(6)   | 47(3)    |
| N353 | 8357(13)  | 2789(3)   | 6903(7)   | 50(3)    |
| C023 | 9781(14)  | 2855(5)   | 7091(7)   | 70(3)    |
| C301 | -1234(7)  | 364.0(18) | 11887(4)  | 64.7(16) |
| C302 | -358(7)   | 374.9(18) | 11196(4)  | 67.7(16) |
| C303 | 825(7)    | 615.1(19) | 11167(4)  | 69.2(17) |
| C304 | 1183(8)   | 839(2)    | 11800(4)  | 78(2)    |
| C305 | 298(8)    | 839(2)    | 12488(4)  | 78.2(19) |
| C306 | -919(8)   | 589(2)    | 12529(4)  | 74.9(19) |
| C307 | 578(12)   | 1095(3)   | 13189(5)  | 102(3)   |
| C308 | 2020(30)  | 652(9)    | 10558(16) | 64(6)    |
| C309 | 2270(30)  | 977(11)   | 10180(20) | 56(5)    |
| C310 | 2310(30)  | 974(9)    | 9348(16)  | 57(6)    |
| C311 | 2910(30)  | 1263(9)   | 8821(17)  | 62(6)    |
| C312 | 2820(30)  | 1230(8)   | 7966(19)  | 66(6)    |
| C313 | 3310(20)  | 1513(5)   | 7481(13)  | 54(4)    |
| C314 | 4084(15)  | 1815(5)   | 7926(10)  | 53(3)    |
| C315 | 4225(17)  | 1851(5)   | 8775(12)  | 61(4)    |
| C316 | 3550(20)  | 1550(6)   | 9203(14)  | 64(5)    |
| C317 | 2130(30)  | 938(10)   | 7390(20)  | 65(6)    |
| C318 | 2020(30)  | 967(8)    | 6600(20)  | 75(7)    |
| C319 | 2520(40)  | 1229(8)   | 6190(20)  | 66(7)    |
| C320 | 3220(30)  | 1505(6)   | 6641(16)  | 65(6)    |
| C321 | 4820(20)  | 2111(10)  | 7476(13)  | 61(4)    |
| C322 | 5134(15)  | 2770(5)   | 7396(10)  | 65(3)    |
| C323 | 6887(15)  | 2803(6)   | 7591(9)   | 70(4)    |
| C325 | 10109(14) | 3215(4)   | 7514(9)   | 87(4)    |
| C326 | 3330(30)  | 403(7)    | 10733(19) | 76(5)    |
| C351 | 1700(20)  | 603(6)    | 10369(11) | 50(4)    |

---

---

|      |           |         |           |          |
|------|-----------|---------|-----------|----------|
| C352 | 2640(30)  | 974(8)  | 10180(20) | 59(5)    |
| C353 | 2080(30)  | 953(6)  | 9219(13)  | 48(4)    |
| C354 | 2957(18)  | 309(4)  | 10451(8)  | 51(3)    |
| C355 | 2860(30)  | 1198(6) | 8670(12)  | 49(4)    |
| C356 | 2650(30)  | 1169(5) | 7811(11)  | 48(4)    |
| C357 | 1740(20)  | 894(5)  | 7455(11)  | 39(3)    |
| C358 | 1617(19)  | 879(4)  | 6592(10)  | 40(3)    |
| C359 | 2360(30)  | 1127(5) | 6122(14)  | 47(4)    |
| C360 | 3360(20)  | 1387(4) | 6498(9)   | 45(3)    |
| C361 | 3593(17)  | 1419(3) | 7334(8)   | 45(3)    |
| C362 | 4450(16)  | 1696(3) | 7740(6)   | 49(2)    |
| C363 | 4522(17)  | 1719(3) | 8582(7)   | 52(3)    |
| C364 | 3802(19)  | 1466(4) | 9039(9)   | 51(3)    |
| C365 | 5270(20)  | 1961(4) | 7284(8)   | 52(3)    |
| C366 | 5730(12)  | 2598(3) | 7124(5)   | 44.3(19) |
| C367 | 7400(13)  | 2627(3) | 7422(5)   | 44(2)    |
| C368 | 9430(20)  | 3043(8) | 7116(18)  | 122(6)   |
| C369 | 10200(30) | 2732(8) | 6700(20)  | 136(5)   |
| C110 | -3128(12) | 4975(4) | 411(7)    | 78(3)    |
| F101 | 440(20)   | 4284(5) | -1509(10) | 123(5)   |
| F102 | 340(20)   | 3768(6) | -745(12)  | 117(5)   |
| F103 | 2280(20)  | 4031(5) | -771(9)   | 108(4)   |
| F104 | 4011(16)  | 4748(6) | 1603(13)  | 57(3)    |
| F105 | 2316(15)  | 5087(5) | 2158(11)  | 46(2)    |
| F106 | 3895(13)  | 4749(4) | 2906(7)   | 44(2)    |
| F107 | 10518(11) | 2516(2) | 5385(7)   | 97(3)    |
| F108 | 10643(11) | 2163(3) | 6415(7)   | 110(3)   |
| F109 | 12285(12) | 2136(3) | 5538(9)   | 122(3)   |
| O101 | 860(12)   | 4490(4) | 2773(10)  | 47(3)    |

---



---

|      |           |         |          |        |
|------|-----------|---------|----------|--------|
| O102 | 6525(9)   | 2851(3) | 5284(5)  | 60(2)  |
| O103 | 7837(12)  | 2249(5) | 4042(8)  | 109(4) |
| N101 | 1340(13)  | 4238(4) | 3366(9)  | 42(2)  |
| N102 | 4889(15)  | 2507(4) | 4497(7)  | 68(3)  |
| N103 | 8160(12)  | 1959(3) | 5238(7)  | 81(3)  |
| C101 | 590(30)   | 4069(5) | -801(15) | 69(4)  |
| C102 | 270(30)   | 4307(6) | -105(15) | 64(4)  |
| C103 | -950(20)  | 4510(5) | -199(10) | 56(4)  |
| C104 | -1470(20) | 4719(4) | 461(12)  | 47(3)  |
| C105 | -490(20)  | 4690(5) | 1232(14) | 48(3)  |
| C106 | 830(20)   | 4478(6) | 1296(16) | 51(4)  |
| C107 | 1280(30)  | 4285(6) | 630(15)  | 57(4)  |
| C108 | 1852(14)  | 4456(5) | 2112(10) | 44(3)  |
| C109 | 3063(16)  | 4764(5) | 2198(13) | 43(3)  |
| C110 | 2722(14)  | 4101(5) | 2286(10) | 47(3)  |
| C111 | 2366(13)  | 4034(4) | 3139(10) | 41(3)  |
| C112 | 3141(12)  | 3732(4) | 3571(9)  | 43(3)  |
| C113 | 3880(15)  | 3483(4) | 3137(10) | 49(3)  |
| C114 | 4706(16)  | 3202(4) | 3505(9)  | 55(3)  |
| C115 | 4648(15)  | 3141(4) | 4342(8)  | 55(3)  |
| C116 | 3910(13)  | 3399(4) | 4811(8)  | 51(2)  |
| C117 | 3081(12)  | 3702(4) | 4439(9)  | 45(3)  |
| C118 | 2361(12)  | 3939(4) | 4944(8)  | 47(3)  |
| C119 | 2289(13)  | 3898(5) | 5755(8)  | 47(2)  |
| C120 | 3083(13)  | 3602(4) | 6138(7)  | 50(3)  |
| C121 | 3864(14)  | 3366(4) | 5681(7)  | 57(3)  |
| C122 | 5495(17)  | 2819(5) | 4735(7)  | 64(3)  |
| C123 | 5641(17)  | 2183(5) | 4811(8)  | 76(3)  |
| C124 | 7319(17)  | 2123(4) | 4653(7)  | 79(3)  |

---

---

|      |           |         |           |        |
|------|-----------|---------|-----------|--------|
| C125 | 9891(14)  | 1926(5) | 5206(11)  | 98(4)  |
| C126 | 10813(18) | 2153(5) | 5569(10)  | 103(4) |
| C120 | -3336(17) | 5061(5) | 472(7)    | 81(4)  |
| F201 | 1790(20)  | 4116(5) | -915(12)  | 88(4)  |
| F202 | -265(19)  | 4215(4) | -1529(10) | 84(4)  |
| F203 | -329(17)  | 3804(6) | -770(14)  | 86(4)  |
| F204 | 3590(20)  | 4800(6) | 1500(15)  | 52(3)  |
| F205 | 1890(20)  | 5134(7) | 2083(15)  | 62(5)  |
| F206 | 3520(20)  | 4788(6) | 2768(11)  | 63(4)  |
| F207 | 11476(17) | 2561(3) | 5010(9)   | 145(5) |
| F208 | 13030(17) | 2128(4) | 5089(9)   | 145(5) |
| F209 | 11310(17) | 2164(4) | 5934(7)   | 111(4) |
| O201 | 394(16)   | 4558(4) | 2702(9)   | 45(3)  |
| O202 | 6258(18)  | 3025(3) | 5422(7)   | 74(4)  |
| O203 | 7924(17)  | 2458(2) | 3736(5)   | 80(3)  |
| N201 | 884(18)   | 4332(5) | 3333(10)  | 46(3)  |
| N202 | 5220(20)  | 2645(4) | 4464(10)  | 73(3)  |
| N203 | 8786(19)  | 2055(4) | 4748(6)   | 94(3)  |
| C201 | 340(40)   | 4167(8) | -840(20)  | 89(5)  |
| C202 | -50(30)   | 4381(7) | -147(17)  | 54(4)  |
| C203 | -1410(20) | 4607(5) | -170(14)  | 52(4)  |
| C204 | -1720(30) | 4811(6) | 534(16)   | 57(4)  |
| C205 | -810(30)  | 4770(7) | 1198(19)  | 54(4)  |
| C206 | 520(30)   | 4539(7) | 1248(17)  | 45(4)  |
| C207 | 890(20)   | 4345(7) | 563(17)   | 49(4)  |
| C208 | 1430(20)  | 4506(6) | 2031(12)  | 46(3)  |
| C209 | 2610(20)  | 4806(7) | 2125(15)  | 49(4)  |
| C210 | 2187(18)  | 4139(5) | 2200(10)  | 43(3)  |
| C211 | 1890(20)  | 4095(6) | 3085(13)  | 45(3)  |

---

|      |           |         |          |        |
|------|-----------|---------|----------|--------|
| C212 | 2647(19)  | 3819(4) | 3609(11) | 46(3)  |
| C213 | 3440(20)  | 3573(5) | 3208(13) | 47(3)  |
| C214 | 4270(20)  | 3296(5) | 3609(11) | 52(3)  |
| C215 | 4290(20)  | 3264(5) | 4447(11) | 54(3)  |
| C216 | 3390(20)  | 3516(4) | 4879(11) | 56(3)  |
| C217 | 2620(20)  | 3796(5) | 4487(12) | 51(3)  |
| C218 | 1800(20)  | 4041(4) | 4938(10) | 54(3)  |
| C219 | 1730(20)  | 4011(5) | 5752(10) | 58(3)  |
| C220 | 2510(20)  | 3728(5) | 6110(12) | 57(3)  |
| C221 | 3290(20)  | 3485(5) | 5751(13) | 59(3)  |
| C222 | 5320(20)  | 2978(5) | 4852(10) | 65(3)  |
| C223 | 6130(20)  | 2338(5) | 4731(9)  | 71(3)  |
| C224 | 7470(30)  | 2294(5) | 4403(8)  | 78(3)  |
| C225 | 10490(19) | 2017(4) | 4624(8)  | 104(4) |
| C226 | 11500(20) | 2210(4) | 5165(10) | 119(4) |
| O1   | 6892(16)  | 1607(4) | 6028(9)  | 104(4) |
| O2   | 8226(14)  | 1661(6) | 6103(9)  | 170(8) |

Table S6. Anisotropic Displacement Parameters ( $\text{\AA}^2 \times 10^3$ ). The Anisotropic displacement factor exponent takes the form:  $-2\pi^2[h^2a^2U_{11}+2hka*b*U_{12}+\dots]$ .

| Atom | $U_{11}$ | $U_{22}$ | $U_{33}$ | $U_{12}$ | $U_{13}$ | $U_{23}$ |
|------|----------|----------|----------|----------|----------|----------|
| Cl01 | 75.0(10) | 73.8(11) | 83.2(11) | 29.4(8)  | 25.9(8)  | 16.6(8)  |
| F301 | 146(4)   | 213(7)   | 60(3)    | 17(3)    | -15(3)   | 58(5)    |
| F302 | 195(7)   | 331(13)  | 92(4)    | -56(6)   | 26(4)    | -115(8)  |
| F303 | 189(6)   | 126(5)   | 98(4)    | -14(3)   | -62(4)   | 17(5)    |
| F304 | 90(10)   | 91(11)   | 117(12)  | 35(10)   | 43(8)    | 24(8)    |
| F305 | 84(9)    | 86(11)   | 123(13)  | 58(9)    | 62(9)    | 37(7)    |
| F306 | 87(8)    | 119(13)  | 69(9)    | 43(7)    | 20(7)    | 55(9)    |
| F307 | 121(6)   | 85(5)    | 62(4)    | -15(3)   | 1(4)     | -65(5)   |

---

|      |         |         |         |        |        |         |
|------|---------|---------|---------|--------|--------|---------|
| F308 | 72(5)   | 212(11) | 178(9)  | 131(9) | -42(5) | -92(6)  |
| F309 | 64(4)   | 96(5)   | 121(6)  | 42(5)  | 3(4)   | -33(4)  |
| F351 | 86(5)   | 60(6)   | 45(5)   | 14(4)  | -5(5)  | 23(5)   |
| F352 | 80(6)   | 45(5)   | 68(5)   | 20(4)  | 4(4)   | 9(4)    |
| F353 | 80(6)   | 37(4)   | 67(5)   | 27(3)  | 13(4)  | 12(3)   |
| F354 | 159(11) | 171(14) | 192(14) | 87(12) | 13(11) | -14(11) |
| F355 | 82(7)   | 255(16) | 201(14) | 90(13) | 14(8)  | -16(9)  |
| F356 | 129(9)  | 185(13) | 171(13) | 59(11) | 31(9)  | 28(10)  |
| O301 | 58(9)   | 85(8)   | 60(10)  | 51(8)  | 16(8)  | 18(7)   |
| O302 | 56(6)   | 84(9)   | 65(7)   | 12(7)  | 7(5)   | 17(6)   |
| O303 | 45(6)   | 195(16) | 50(6)   | 29(8)  | -8(4)  | -17(8)  |
| O351 | 66(7)   | 38(4)   | 46(5)   | 15(4)  | -13(4) | 9(4)    |
| O352 | 80(5)   | 48(4)   | 32(3)   | 7(3)   | -5(3)  | -12(4)  |
| O353 | 61(5)   | 67(5)   | 30(3)   | 9(3)   | -5(3)  | 8(3)    |
| N301 | 60(11)  | 79(12)  | 44(9)   | 31(9)  | 15(9)  | 25(8)   |
| N302 | 45(5)   | 63(8)   | 54(6)   | 35(6)  | 0(4)   | -6(5)   |
| N303 | 56(8)   | 148(13) | 61(8)   | 35(9)  | -37(6) | -44(8)  |
| N351 | 63(9)   | 33(5)   | 53(8)   | 10(5)  | -7(5)  | -3(5)   |
| N352 | 72(7)   | 41(6)   | 28(4)   | -5(4)  | 6(4)   | -6(5)   |
| N353 | 51(6)   | 68(6)   | 33(4)   | 7(4)   | 4(4)   | 13(4)   |
| C023 | 63(6)   | 112(9)  | 37(5)   | 17(6)  | 23(4)  | 20(6)   |
| C301 | 59(3)   | 67(4)   | 70(4)   | 36(3)  | 18(3)  | 22(3)   |
| C302 | 73(4)   | 60(3)   | 72(4)   | 33(3)  | 20(3)  | 24(3)   |
| C303 | 59(3)   | 72(4)   | 78(4)   | 42(3)  | 13(3)  | 23(3)   |
| C304 | 71(4)   | 90(5)   | 72(4)   | 42(4)  | -2(3)  | 11(3)   |
| C305 | 73(4)   | 101(5)  | 59(3)   | 28(3)  | -6(3)  | 19(4)   |
| C306 | 80(4)   | 87(5)   | 58(3)   | 31(3)  | 13(3)  | 29(4)   |
| C307 | 103(6)  | 139(8)  | 62(4)   | 11(5)  | -11(4) | 17(6)   |
| C308 | 43(9)   | 84(11)  | 68(11)  | 38(9)  | 14(8)  | 16(7)   |

---

---

|      |        |         |        |        |        |        |
|------|--------|---------|--------|--------|--------|--------|
| C309 | 30(8)  | 87(11)  | 53(9)  | 37(7)  | 11(7)  | 26(7)  |
| C310 | 45(8)  | 80(11)  | 48(9)  | 33(8)  | 22(8)  | 12(7)  |
| C311 | 57(9)  | 67(12)  | 65(11) | 34(9)  | 26(8)  | 27(9)  |
| C312 | 45(9)  | 67(11)  | 87(12) | 26(9)  | 22(9)  | 22(8)  |
| C313 | 35(6)  | 64(10)  | 67(8)  | 31(7)  | 29(5)  | 37(6)  |
| C314 | 33(5)  | 65(9)   | 62(8)  | 21(6)  | 13(5)  | 20(5)  |
| C315 | 44(6)  | 72(10)  | 72(9)  | 36(7)  | 24(6)  | 31(6)  |
| C316 | 51(7)  | 76(12)  | 69(10) | 36(8)  | 35(7)  | 29(7)  |
| C317 | 56(11) | 53(10)  | 92(12) | 35(8)  | 42(9)  | 11(8)  |
| C318 | 67(12) | 72(13)  | 89(12) | 20(11) | 24(10) | 17(9)  |
| C319 | 48(10) | 67(15)  | 87(13) | 22(11) | 25(9)  | 14(11) |
| C320 | 41(7)  | 74(12)  | 80(12) | 21(9)  | 6(7)   | 28(8)  |
| C321 | 48(7)  | 83(12)  | 50(8)  | 21(10) | 0(6)   | 18(8)  |
| C322 | 45(6)  | 82(9)   | 67(7)  | 35(7)  | -15(5) | -28(6) |
| C323 | 36(6)  | 125(11) | 48(6)  | 19(8)  | -2(5)  | -1(7)  |
| C325 | 56(6)  | 114(9)  | 87(8)  | 41(7)  | -9(5)  | -47(6) |
| C326 | 65(11) | 90(13)  | 76(13) | 33(10) | 28(9)  | 21(9)  |
| C351 | 49(8)  | 54(6)   | 43(7)  | 19(5)  | -10(5) | 9(5)   |
| C352 | 62(11) | 56(8)   | 59(8)  | 23(6)  | -4(9)  | 3(9)   |
| C353 | 66(8)  | 26(5)   | 49(7)  | 12(5)  | -13(5) | 1(5)   |
| C354 | 64(7)  | 49(7)   | 40(6)  | 14(5)  | -5(5)  | -3(5)  |
| C355 | 65(7)  | 39(7)   | 40(7)  | 4(5)   | -18(5) | -3(5)  |
| C356 | 60(7)  | 38(7)   | 44(6)  | 16(5)  | -12(5) | -1(5)  |
| C357 | 46(8)  | 33(6)   | 39(5)  | 10(4)  | 18(5)  | 0(5)   |
| C358 | 47(7)  | 35(6)   | 40(5)  | 10(4)  | 13(4)  | 3(4)   |
| C359 | 49(7)  | 41(8)   | 49(6)  | 6(6)   | 4(5)   | -4(6)  |
| C360 | 54(7)  | 41(7)   | 39(5)  | 7(5)   | 7(5)   | 2(6)   |
| C361 | 59(7)  | 33(6)   | 42(6)  | 6(4)   | -1(5)  | 15(5)  |
| C362 | 68(7)  | 43(6)   | 35(5)  | 7(4)   | 7(4)   | 6(5)   |

---

---

|      |         |         |        |        |        |         |
|------|---------|---------|--------|--------|--------|---------|
| C363 | 78(8)   | 38(6)   | 38(5)  | 7(4)   | -11(5) | -10(5)  |
| C364 | 62(7)   | 46(6)   | 43(6)  | 5(4)   | -10(5) | -2(5)   |
| C365 | 82(8)   | 41(6)   | 30(5)  | 6(5)   | -10(5) | -10(6)  |
| C366 | 62(5)   | 35(5)   | 36(4)  | 6(3)   | 2(4)   | 0(4)    |
| C367 | 60(5)   | 39(5)   | 31(4)  | 5(3)   | 1(4)   | -3(4)   |
| C368 | 108(8)  | 138(9)  | 121(9) | 44(8)  | 8(7)   | -13(7)  |
| C369 | 106(8)  | 159(10) | 143(9) | 74(9)  | 8(8)   | -15(8)  |
| C110 | 60(3)   | 93(5)   | 82(4)  | 8(3)   | 13(2)  | -23(4)  |
| F101 | 176(13) | 153(11) | 43(5)  | -4(6)  | 19(8)  | -24(9)  |
| F102 | 185(13) | 85(8)   | 79(6)  | -18(5) | 5(10)  | -15(10) |
| F103 | 173(12) | 101(8)  | 51(6)  | -6(5)  | 20(7)  | 35(7)   |
| F104 | 40(7)   | 71(7)   | 61(7)  | 12(5)  | 6(5)   | -10(5)  |
| F105 | 45(5)   | 45(6)   | 49(5)  | 1(4)   | -4(4)  | -1(4)   |
| F106 | 42(5)   | 52(5)   | 34(5)  | 2(4)   | -18(4) | -17(4)  |
| F107 | 79(5)   | 78(5)   | 130(7) | -2(5)  | -22(5) | 19(4)   |
| F108 | 80(5)   | 136(8)  | 114(7) | 14(6)  | 4(5)   | -4(5)   |
| F109 | 94(6)   | 134(9)  | 140(9) | 25(7)  | 30(7)  | 22(6)   |
| O101 | 37(4)   | 59(5)   | 44(5)  | 2(4)   | 1(4)   | -4(4)   |
| O102 | 49(4)   | 87(7)   | 41(4)  | -3(5)  | -18(3) | 12(4)   |
| O103 | 79(6)   | 166(12) | 88(8)  | -7(8)  | 39(5)  | -27(7)  |
| N101 | 33(5)   | 55(6)   | 35(4)  | 4(4)   | -11(4) | -4(4)   |
| N102 | 77(6)   | 81(7)   | 43(4)  | 21(5)  | -8(4)  | -13(5)  |
| N103 | 83(6)   | 72(6)   | 87(6)  | 0(5)   | 8(5)   | -5(5)   |
| C101 | 92(8)   | 64(8)   | 50(6)  | -8(6)  | 3(6)   | -6(6)   |
| C102 | 96(8)   | 59(7)   | 37(5)  | 1(5)   | 10(6)  | -19(6)  |
| C103 | 79(8)   | 59(8)   | 33(5)  | 1(5)   | 13(6)  | -26(6)  |
| C104 | 53(6)   | 46(7)   | 44(5)  | -7(5)  | 15(4)  | -19(5)  |
| C105 | 54(7)   | 52(7)   | 39(5)  | -6(6)  | 9(6)   | -23(6)  |
| C106 | 54(7)   | 57(7)   | 42(5)  | 4(5)   | 6(5)   | -19(5)  |

---

---

|      |         |         |         |        |        |        |
|------|---------|---------|---------|--------|--------|--------|
| C107 | 80(8)   | 54(7)   | 38(6)   | 3(5)   | 10(6)  | -15(6) |
| C108 | 39(5)   | 53(5)   | 40(5)   | 5(4)   | 4(4)   | -8(4)  |
| C109 | 39(6)   | 49(6)   | 43(6)   | 3(5)   | 4(5)   | -12(5) |
| C110 | 39(5)   | 55(5)   | 45(6)   | 2(4)   | -3(5)  | -3(5)  |
| C111 | 28(4)   | 55(6)   | 38(5)   | 2(4)   | -7(4)  | -12(4) |
| C112 | 29(4)   | 62(6)   | 36(4)   | 4(4)   | -6(4)  | -4(4)  |
| C113 | 43(5)   | 67(7)   | 37(5)   | 6(5)   | -4(4)  | 4(4)   |
| C114 | 56(5)   | 73(7)   | 35(5)   | -3(5)  | -4(4)  | 19(5)  |
| C115 | 55(5)   | 73(6)   | 36(5)   | -2(5)  | -9(4)  | 12(4)  |
| C116 | 45(4)   | 72(6)   | 34(4)   | -2(5)  | -6(4)  | 5(4)   |
| C117 | 30(4)   | 66(6)   | 38(4)   | -2(5)  | -7(4)  | 0(4)   |
| C118 | 33(4)   | 64(7)   | 43(5)   | -6(5)  | -6(4)  | -8(4)  |
| C119 | 36(4)   | 69(7)   | 35(4)   | -2(5)  | -3(4)  | -3(4)  |
| C120 | 48(5)   | 77(7)   | 26(4)   | -2(5)  | -6(4)  | 9(5)   |
| C121 | 56(5)   | 82(7)   | 33(4)   | -9(5)  | -3(4)  | 11(5)  |
| C122 | 79(5)   | 77(6)   | 34(4)   | 2(5)   | -13(4) | 6(5)   |
| C123 | 88(6)   | 87(7)   | 50(5)   | 21(5)  | -20(5) | -21(6) |
| C124 | 102(6)  | 89(7)   | 47(5)   | 4(5)   | 11(5)  | -28(6) |
| C125 | 77(7)   | 109(10) | 110(9)  | 5(8)   | 22(7)  | 16(7)  |
| C126 | 75(7)   | 120(9)  | 114(9)  | 22(8)  | -4(7)  | -10(7) |
| C120 | 92(6)   | 104(8)  | 50(3)   | 14(4)  | 16(3)  | -6(4)  |
| F201 | 99(9)   | 109(10) | 56(7)   | -6(7)  | -1(6)  | 6(7)   |
| F202 | 133(9)  | 85(7)   | 33(4)   | -16(4) | -7(6)  | -1(7)  |
| F203 | 97(8)   | 79(8)   | 80(7)   | -31(5) | -12(7) | -8(7)  |
| F204 | 44(8)   | 57(7)   | 52(6)   | 6(5)   | -5(6)  | -13(6) |
| F205 | 73(11)  | 50(8)   | 60(6)   | -10(5) | -22(7) | -2(7)  |
| F206 | 68(9)   | 68(7)   | 46(6)   | 20(4)  | -49(5) | -25(6) |
| F207 | 133(9)  | 137(10) | 173(11) | 80(9)  | 78(9)  | 60(8)  |
| F208 | 185(12) | 138(10) | 118(9)  | 72(8)  | 53(9)  | 66(9)  |

---

---

|      |         |        |       |        |        |        |
|------|---------|--------|-------|--------|--------|--------|
| F209 | 127(10) | 120(9) | 91(8) | 44(7)  | 53(8)  | 50(8)  |
| O201 | 57(7)   | 55(6)  | 21(4) | 3(4)   | -5(5)  | -9(5)  |
| O202 | 121(9)  | 52(6)  | 41(5) | -8(5)  | -39(6) | 0(6)   |
| O203 | 167(9)  | 31(4)  | 39(4) | 26(4)  | -8(5)  | -16(5) |
| N201 | 48(7)   | 59(7)  | 28(5) | 5(5)   | -9(5)  | -9(5)  |
| N202 | 100(7)  | 59(7)  | 51(5) | 32(5)  | -40(5) | -32(6) |
| N203 | 175(9)  | 76(6)  | 33(4) | 36(5)  | 23(6)  | 48(6)  |
| C201 | 133(10) | 86(9)  | 48(7) | -10(8) | 10(7)  | -8(8)  |
| C202 | 66(7)   | 58(8)  | 39(6) | -13(6) | 4(6)   | -20(6) |
| C203 | 61(7)   | 56(8)  | 39(6) | -8(6)  | 2(6)   | -22(6) |
| C204 | 65(8)   | 66(9)  | 42(6) | 0(7)   | 15(6)  | -21(7) |
| C205 | 60(8)   | 64(9)  | 38(6) | 4(6)   | 11(6)  | -11(6) |
| C206 | 55(7)   | 48(7)  | 31(5) | -7(5)  | 1(6)   | -22(6) |
| C207 | 56(7)   | 55(8)  | 37(6) | -10(6) | 3(6)   | -23(6) |
| C208 | 55(6)   | 50(6)  | 30(5) | -3(4)  | -8(5)  | -17(5) |
| C209 | 60(8)   | 51(7)  | 33(6) | 0(5)   | -20(6) | -15(7) |
| C210 | 49(7)   | 50(6)  | 26(4) | 8(4)   | -15(5) | -22(6) |
| C211 | 48(7)   | 50(6)  | 35(5) | 2(5)   | -15(6) | -18(6) |
| C212 | 48(6)   | 49(6)  | 39(5) | -5(5)  | -10(5) | -19(5) |
| C213 | 55(7)   | 49(7)  | 36(6) | -8(5)  | -6(6)  | -17(6) |
| C214 | 63(7)   | 52(7)  | 41(6) | -11(5) | -1(6)  | -11(6) |
| C215 | 71(7)   | 47(6)  | 41(5) | -6(5)  | -4(5)  | -17(5) |
| C216 | 66(6)   | 46(6)  | 53(6) | -11(5) | -9(5)  | -22(5) |
| C217 | 59(6)   | 51(6)  | 40(5) | -11(5) | -7(6)  | -14(5) |
| C218 | 63(7)   | 50(6)  | 47(5) | -13(5) | -11(6) | -15(6) |
| C219 | 68(7)   | 55(7)  | 48(6) | -14(5) | -12(6) | -6(6)  |
| C220 | 68(7)   | 51(7)  | 51(6) | -11(6) | -11(6) | -6(6)  |
| C221 | 70(7)   | 50(7)  | 55(7) | -5(6)  | -6(7)  | -10(6) |
| C222 | 96(7)   | 50(6)  | 47(6) | 10(5)  | -17(5) | -20(6) |

---



|      |        |         |         |        |        |       |
|------|--------|---------|---------|--------|--------|-------|
| C223 | 103(7) | 67(6)   | 39(5)   | 26(5)  | -17(5) | -8(6) |
| C224 | 146(8) | 59(6)   | 29(5)   | 28(5)  | 3(6)   | 15(7) |
| C225 | 174(9) | 88(7)   | 55(6)   | 37(6)  | 44(7)  | 75(7) |
| C226 | 157(9) | 111(8)  | 97(8)   | 46(7)  | 56(8)  | 71(8) |
| O1   | 85(8)  | 95(9)   | 131(11) | 37(8)  | 0(7)   | 23(7) |
| O2   | 65(7)  | 310(30) | 134(11) | 73(13) | 23(7)  | 11(9) |

Table S7. Bond Lengths.

| Atom | Atom | Length/Å  | Atom | Atom | Length/Å  |
|------|------|-----------|------|------|-----------|
| C101 | C301 | 1.708(7)  | F106 | C109 | 1.326(19) |
| F301 | C307 | 1.296(10) | F107 | C126 | 1.410(17) |
| F302 | C307 | 1.352(13) | F108 | C126 | 1.422(15) |
| F303 | C307 | 1.255(11) | F109 | C126 | 1.265(15) |
| F304 | C326 | 1.28(3)   | O101 | N101 | 1.398(15) |
| F305 | C326 | 1.39(3)   | O101 | C108 | 1.442(19) |
| F306 | C326 | 1.32(3)   | O102 | C122 | 1.223(13) |
| F307 | C325 | 1.261(17) | O103 | C124 | 1.227(13) |
| F308 | C325 | 1.386(14) | N101 | C111 | 1.240(18) |
| F309 | C325 | 1.322(16) | N102 | C122 | 1.32(2)   |
| F351 | C354 | 1.371(15) | N102 | C123 | 1.45(2)   |
| F352 | C354 | 1.33(2)   | N103 | C124 | 1.314(15) |
| F353 | C354 | 1.317(18) | N103 | C125 | 1.490(14) |
| F354 | C369 | 1.20(3)   | C101 | C102 | 1.50(3)   |
| F355 | C369 | 1.32(3)   | C102 | C103 | 1.29(3)   |
| F356 | C369 | 1.44(3)   | C102 | C107 | 1.44(3)   |
| O301 | N301 | 1.48(3)   | C103 | C104 | 1.44(2)   |
| O301 | C308 | 1.51(3)   | C104 | C105 | 1.48(3)   |
| O302 | C321 | 1.17(2)   | C105 | C106 | 1.38(2)   |
| O303 | C323 | 1.239(17) | C106 | C107 | 1.40(3)   |

---

|      |      |           |      |      |           |
|------|------|-----------|------|------|-----------|
| O351 | N351 | 1.40(3)   | C106 | C108 | 1.55(2)   |
| O351 | C351 | 1.462(16) | C108 | C110 | 1.536(19) |
| O352 | C365 | 1.21(2)   | C108 | C109 | 1.55(2)   |
| O353 | C367 | 1.225(11) | C110 | C111 | 1.49(2)   |
| N301 | C310 | 1.22(4)   | C111 | C112 | 1.467(18) |
| N302 | C321 | 1.34(3)   | C112 | C113 | 1.359(18) |
| N302 | C322 | 1.459(17) | C112 | C117 | 1.446(19) |
| N303 | C323 | 1.41(2)   | C113 | C114 | 1.382(18) |
| N303 | C368 | 1.485(18) | C114 | C115 | 1.409(18) |
| N351 | C353 | 1.30(3)   | C115 | C116 | 1.414(17) |
| N352 | C365 | 1.326(18) | C115 | C122 | 1.53(2)   |
| N352 | C366 | 1.443(15) | C116 | C121 | 1.450(16) |
| N353 | C023 | 1.259(18) | C116 | C117 | 1.447(18) |
| N353 | C367 | 1.371(15) | C117 | C118 | 1.393(17) |
| C023 | C325 | 1.53(2)   | C118 | C119 | 1.358(17) |
| C301 | C306 | 1.365(11) | C119 | C120 | 1.421(18) |
| C301 | C302 | 1.416(8)  | C120 | C121 | 1.367(17) |
| C302 | C303 | 1.356(10) | C123 | C124 | 1.49(2)   |
| C303 | C304 | 1.358(11) | C125 | C126 | 1.27(2)   |
| C303 | C308 | 1.49(3)   | C120 | C204 | 1.67(3)   |
| C303 | C351 | 1.57(2)   | F201 | C201 | 1.27(4)   |
| C304 | C305 | 1.415(10) | F202 | C201 | 1.23(4)   |
| C305 | C306 | 1.403(11) | F203 | C201 | 1.48(4)   |
| C305 | C307 | 1.510(13) | F204 | C209 | 1.38(4)   |
| C308 | C309 | 1.39(5)   | F205 | C209 | 1.37(3)   |
| C308 | C326 | 1.47(4)   | F206 | C209 | 1.27(2)   |
| C309 | C310 | 1.38(5)   | F207 | C226 | 1.334(15) |
| C310 | C311 | 1.50(4)   | F208 | C226 | 1.359(16) |
| C311 | C316 | 1.34(4)   | F209 | C226 | 1.308(16) |

---

---

|      |      |           |      |      |           |
|------|------|-----------|------|------|-----------|
| C311 | C312 | 1.42(4)   | O201 | N201 | 1.383(18) |
| C312 | C313 | 1.41(4)   | O201 | C208 | 1.49(2)   |
| C312 | C317 | 1.53(4)   | O202 | C222 | 1.207(14) |
| C313 | C320 | 1.39(3)   | O203 | C224 | 1.348(15) |
| C313 | C314 | 1.47(3)   | N201 | C211 | 1.32(3)   |
| C314 | C315 | 1.41(2)   | N202 | C222 | 1.40(2)   |
| C314 | C321 | 1.50(3)   | N202 | C223 | 1.44(2)   |
| C315 | C316 | 1.47(3)   | N203 | C225 | 1.494(16) |
| C317 | C318 | 1.31(5)   | N203 | C224 | 1.52(2)   |
| C318 | C319 | 1.29(4)   | C201 | C202 | 1.46(4)   |
| C319 | C320 | 1.39(4)   | C202 | C207 | 1.38(3)   |
| C322 | C323 | 1.514(17) | C202 | C203 | 1.44(3)   |
| C351 | C354 | 1.53(2)   | C203 | C204 | 1.43(3)   |
| C351 | C352 | 1.64(4)   | C204 | C205 | 1.31(3)   |
| C352 | C353 | 1.63(4)   | C205 | C206 | 1.42(3)   |
| C353 | C355 | 1.48(3)   | C206 | C207 | 1.40(3)   |
| C355 | C364 | 1.40(2)   | C206 | C208 | 1.47(3)   |
| C355 | C356 | 1.42(2)   | C208 | C209 | 1.51(3)   |
| C356 | C357 | 1.39(2)   | C208 | C210 | 1.53(2)   |
| C356 | C361 | 1.50(3)   | C210 | C211 | 1.51(3)   |
| C357 | C358 | 1.43(2)   | C211 | C212 | 1.47(2)   |
| C358 | C359 | 1.39(2)   | C212 | C213 | 1.34(2)   |
| C359 | C360 | 1.41(2)   | C212 | C217 | 1.46(2)   |
| C360 | C361 | 1.390(19) | C213 | C214 | 1.40(2)   |
| C361 | C362 | 1.409(19) | C214 | C215 | 1.39(2)   |
| C362 | C363 | 1.394(15) | C215 | C216 | 1.44(2)   |
| C362 | C365 | 1.46(2)   | C215 | C222 | 1.51(2)   |
| C363 | C364 | 1.38(2)   | C216 | C217 | 1.37(2)   |
| C366 | C367 | 1.479(15) | C216 | C221 | 1.46(3)   |

---

|      |      |         |      |      |           |
|------|------|---------|------|------|-----------|
| C368 | C369 | 1.53(2) | C217 | C218 | 1.40(2)   |
| C110 | C104 | 1.71(2) | C218 | C219 | 1.36(2)   |
| F101 | C101 | 1.42(3) | C219 | C220 | 1.36(2)   |
| F102 | C101 | 1.15(3) | C220 | C221 | 1.29(3)   |
| F103 | C101 | 1.45(3) | C223 | C224 | 1.32(3)   |
| F104 | C109 | 1.32(3) | C225 | C226 | 1.396(18) |
| F105 | C109 | 1.36(2) |      |      |           |

Table S8. Bond Angles.

| Atom | Atom | Atom | Angle/°   | Atom | Atom | Atom | Angle/°   |
|------|------|------|-----------|------|------|------|-----------|
| N301 | O301 | C308 | 107(2)    | F101 | C101 | C102 | 107.0(16) |
| N351 | O351 | C351 | 110.5(14) | F103 | C101 | C102 | 105.9(17) |
| C310 | N301 | O301 | 111(2)    | C103 | C102 | C107 | 124.4(19) |
| C321 | N302 | C322 | 124.3(17) | C103 | C102 | C101 | 116.7(18) |
| C323 | N303 | C368 | 121.7(17) | C107 | C102 | C101 | 118.9(16) |
| C353 | N351 | O351 | 109.4(16) | C102 | C103 | C104 | 121.1(17) |
| C365 | N352 | C366 | 122.4(12) | C103 | C104 | C105 | 115.6(14) |
| C023 | N353 | C367 | 122.9(10) | C103 | C104 | C110 | 124.5(15) |
| N353 | C023 | C325 | 115.3(13) | C105 | C104 | C110 | 119.8(12) |
| C306 | C301 | C302 | 121.8(7)  | C106 | C105 | C104 | 121.1(16) |
| C306 | C301 | C101 | 119.2(5)  | C105 | C106 | C107 | 120.6(17) |
| C302 | C301 | C101 | 119.0(6)  | C105 | C106 | C108 | 120.1(18) |
| C303 | C302 | C301 | 119.3(7)  | C107 | C106 | C108 | 119.4(14) |
| C302 | C303 | C304 | 120.3(7)  | C106 | C107 | C102 | 117.0(16) |
| C302 | C303 | C308 | 129.4(13) | O101 | C108 | C110 | 103.7(11) |
| C304 | C303 | C308 | 109.8(12) | O101 | C108 | C109 | 107.0(12) |
| C302 | C303 | C351 | 114.4(9)  | C110 | C108 | C109 | 108.2(10) |
| C304 | C303 | C351 | 125.2(9)  | O101 | C108 | C106 | 109.5(11) |
| C303 | C304 | C305 | 121.3(7)  | C110 | C108 | C106 | 116.2(13) |

---

|      |      |      |           |      |      |      |           |
|------|------|------|-----------|------|------|------|-----------|
| C306 | C305 | C304 | 118.9(8)  | C109 | C108 | C106 | 111.6(13) |
| C306 | C305 | C307 | 117.3(7)  | F104 | C109 | F106 | 109.8(12) |
| C304 | C305 | C307 | 123.8(8)  | F104 | C109 | F105 | 108.5(16) |
| C301 | C306 | C305 | 118.3(6)  | F106 | C109 | F105 | 107.5(16) |
| F303 | C307 | F301 | 110.1(8)  | F104 | C109 | C108 | 109.8(17) |
| F303 | C307 | F302 | 103.2(11) | F106 | C109 | C108 | 111.1(14) |
| F301 | C307 | F302 | 106.8(8)  | F105 | C109 | C108 | 110.1(11) |
| F303 | C307 | C305 | 112.3(7)  | C111 | C110 | C108 | 101.0(11) |
| F301 | C307 | C305 | 113.8(10) | N101 | C111 | C112 | 128.8(14) |
| F302 | C307 | C305 | 110.0(8)  | N101 | C111 | C110 | 112.7(12) |
| C309 | C308 | C326 | 120(2)    | C112 | C111 | C110 | 118.3(11) |
| C309 | C308 | C303 | 122(2)    | C113 | C112 | C117 | 121.7(12) |
| C326 | C308 | C303 | 111.0(19) | C113 | C112 | C111 | 118.5(12) |
| C309 | C308 | O301 | 93(2)     | C117 | C112 | C111 | 119.7(13) |
| C326 | C308 | O301 | 105(2)    | C112 | C113 | C114 | 122.0(13) |
| C303 | C308 | O301 | 99.8(15)  | C113 | C114 | C115 | 120.0(12) |
| C310 | C309 | C308 | 117(4)    | C114 | C115 | C116 | 118.9(11) |
| N301 | C310 | C309 | 104(3)    | C114 | C115 | C122 | 119.7(11) |
| N301 | C310 | C311 | 126(3)    | C116 | C115 | C122 | 121.3(11) |
| C309 | C310 | C311 | 128(3)    | C115 | C116 | C121 | 122.4(12) |
| C316 | C311 | C312 | 122(2)    | C115 | C116 | C117 | 121.4(11) |
| C316 | C311 | C310 | 116(2)    | C121 | C116 | C117 | 116.1(13) |
| C312 | C311 | C310 | 122(3)    | C118 | C117 | C112 | 126.8(12) |
| C313 | C312 | C311 | 120(3)    | C118 | C117 | C116 | 117.7(12) |
| C313 | C312 | C317 | 107(2)    | C112 | C117 | C116 | 115.5(11) |
| C311 | C312 | C317 | 132(3)    | C119 | C118 | C117 | 125.4(13) |
| C320 | C313 | C312 | 124(2)    | C118 | C119 | C120 | 118.2(12) |
| C320 | C313 | C314 | 120.6(18) | C121 | C120 | C119 | 119.3(10) |
| C312 | C313 | C314 | 115.4(19) | C120 | C121 | C116 | 123.3(12) |

---

---

|      |      |      |           |      |      |      |           |
|------|------|------|-----------|------|------|------|-----------|
| C315 | C314 | C313 | 125.0(15) | O102 | C122 | N102 | 123.5(15) |
| C315 | C314 | C321 | 114.8(19) | O102 | C122 | C115 | 122.2(16) |
| C313 | C314 | C321 | 120.2(18) | N102 | C122 | C115 | 113.8(11) |
| C314 | C315 | C316 | 114(2)    | N102 | C123 | C124 | 117.8(13) |
| C311 | C316 | C315 | 123(2)    | O103 | C124 | N103 | 125.0(15) |
| C318 | C317 | C312 | 123(3)    | O103 | C124 | C123 | 120.0(13) |
| C319 | C318 | C317 | 127(3)    | N103 | C124 | C123 | 114.8(11) |
| C318 | C319 | C320 | 115(3)    | C126 | C125 | N103 | 120.7(15) |
| C319 | C320 | C313 | 124(2)    | F109 | C126 | C125 | 122.1(16) |
| O302 | C321 | N302 | 117(3)    | F109 | C126 | F107 | 101.5(14) |
| O302 | C321 | C314 | 128(3)    | C125 | C126 | F107 | 116.2(14) |
| N302 | C321 | C314 | 115.1(16) | F109 | C126 | F108 | 102.6(13) |
| N302 | C322 | C323 | 112.6(13) | C125 | C126 | F108 | 112.2(15) |
| O303 | C323 | N303 | 122.5(12) | F107 | C126 | F108 | 99.0(13)  |
| O303 | C323 | C322 | 120.0(12) | N201 | O201 | C208 | 108.7(12) |
| N303 | C323 | C322 | 117.3(11) | C211 | N201 | O201 | 109.9(14) |
| F307 | C325 | F309 | 112.0(15) | C222 | N202 | C223 | 123.6(14) |
| F307 | C325 | F308 | 108.4(12) | C225 | N203 | C224 | 135.1(12) |
| F309 | C325 | F308 | 107.0(9)  | F202 | C201 | F201 | 106(3)    |
| F307 | C325 | C023 | 112.1(9)  | F202 | C201 | C202 | 123(3)    |
| F309 | C325 | C023 | 110.6(12) | F201 | C201 | C202 | 116(3)    |
| F308 | C325 | C023 | 106.3(15) | F202 | C201 | F203 | 94(2)     |
| F304 | C326 | F306 | 104(2)    | F201 | C201 | F203 | 105(2)    |
| F304 | C326 | F305 | 107(2)    | C202 | C201 | F203 | 109(2)    |
| F306 | C326 | F305 | 109(2)    | C207 | C202 | C203 | 120(2)    |
| F304 | C326 | C308 | 116(2)    | C207 | C202 | C201 | 118(2)    |
| F306 | C326 | C308 | 110(2)    | C203 | C202 | C201 | 122(2)    |
| F305 | C326 | C308 | 110(2)    | C204 | C203 | C202 | 119.2(19) |
| O351 | C351 | C354 | 105.3(14) | C205 | C204 | C203 | 119(2)    |

---

---

|      |      |      |           |      |      |      |           |
|------|------|------|-----------|------|------|------|-----------|
| O351 | C351 | C303 | 113.9(14) | C205 | C204 | Cl20 | 123.8(19) |
| C354 | C351 | C303 | 108.8(12) | C203 | C204 | Cl20 | 116.7(18) |
| O351 | C351 | C352 | 108.8(18) | C204 | C205 | C206 | 123(2)    |
| C354 | C351 | C352 | 105.6(15) | C207 | C206 | C205 | 119.5(19) |
| C303 | C351 | C352 | 113.8(17) | C207 | C206 | C208 | 122.4(19) |
| C353 | C352 | C351 | 91.9(19)  | C205 | C206 | C208 | 118(2)    |
| N351 | C353 | C355 | 124.5(17) | C202 | C207 | C206 | 119.2(19) |
| N351 | C353 | C352 | 118(2)    | C206 | C208 | O201 | 110.0(15) |
| C355 | C353 | C352 | 117.5(18) | C206 | C208 | C209 | 109.6(16) |
| F353 | C354 | F352 | 106.4(12) | O201 | C208 | C209 | 104.9(15) |
| F353 | C354 | F351 | 105.6(11) | C206 | C208 | C210 | 115.2(15) |
| F352 | C354 | F351 | 104.8(13) | O201 | C208 | C210 | 104.3(13) |
| F353 | C354 | C351 | 114.8(13) | C209 | C208 | C210 | 112.1(14) |
| F352 | C354 | C351 | 113.1(12) | F206 | C209 | F205 | 110(2)    |
| F351 | C354 | C351 | 111.4(12) | F206 | C209 | F204 | 105.1(18) |
| C364 | C355 | C356 | 121.2(19) | F205 | C209 | F204 | 106(2)    |
| C364 | C355 | C353 | 116.3(15) | F206 | C209 | C208 | 114(2)    |
| C356 | C355 | C353 | 122.6(15) | F205 | C209 | C208 | 111.4(17) |
| C357 | C356 | C355 | 120.3(18) | F204 | C209 | C208 | 110(2)    |
| C357 | C356 | C361 | 122.8(16) | C211 | C210 | C208 | 100.2(15) |
| C355 | C356 | C361 | 116.5(15) | N201 | C211 | C212 | 123.6(18) |
| C356 | C357 | C358 | 116.9(14) | N201 | C211 | C210 | 112.8(14) |
| C359 | C358 | C357 | 122.2(13) | C212 | C211 | C210 | 123.6(19) |
| C358 | C359 | C360 | 119.7(17) | C213 | C212 | C217 | 119.9(16) |
| C361 | C360 | C359 | 122.6(15) | C213 | C212 | C211 | 113.7(16) |
| C360 | C361 | C362 | 124.7(13) | C217 | C212 | C211 | 126.4(17) |
| C360 | C361 | C356 | 115.4(13) | C212 | C213 | C214 | 121.9(17) |
| C362 | C361 | C356 | 119.2(11) | C215 | C214 | C213 | 120.2(16) |
| C363 | C362 | C361 | 120.3(11) | C214 | C215 | C216 | 118.4(15) |

---

|      |      |      |           |      |      |      |           |
|------|------|------|-----------|------|------|------|-----------|
| C363 | C362 | C365 | 119.3(11) | C214 | C215 | C222 | 117.7(18) |
| C361 | C362 | C365 | 120.3(10) | C216 | C215 | C222 | 123.8(16) |
| C364 | C363 | C362 | 121.2(11) | C217 | C216 | C215 | 121.1(16) |
| C363 | C364 | C355 | 121.0(14) | C217 | C216 | C221 | 117.8(16) |
| O352 | C365 | N352 | 121.6(14) | C215 | C216 | C221 | 121.1(16) |
| O352 | C365 | C362 | 124.4(12) | C216 | C217 | C218 | 119.1(16) |
| N352 | C365 | C362 | 114.0(17) | C216 | C217 | C212 | 118.3(16) |
| N352 | C366 | C367 | 111.5(9)  | C218 | C217 | C212 | 122.5(15) |
| O353 | C367 | N353 | 120.6(10) | C219 | C218 | C217 | 122.3(16) |
| O353 | C367 | C366 | 123.9(9)  | C218 | C219 | C220 | 116.1(17) |
| N353 | C367 | C366 | 115.5(8)  | C221 | C220 | C219 | 126.6(19) |
| N303 | C368 | C369 | 95(2)     | C220 | C221 | C216 | 118.1(17) |
| F354 | C369 | F355 | 112(2)    | O202 | C222 | N202 | 120.3(16) |
| F354 | C369 | F356 | 109(3)    | O202 | C222 | C215 | 125.1(15) |
| F355 | C369 | F356 | 108(2)    | N202 | C222 | C215 | 114.3(12) |
| F354 | C369 | C368 | 117(3)    | C224 | C223 | N202 | 116.1(15) |
| F355 | C369 | C368 | 102(2)    | C223 | C224 | O203 | 126.8(15) |
| F356 | C369 | C368 | 107(2)    | C223 | C224 | N203 | 124.3(13) |
| N101 | O101 | C108 | 108.5(10) | O203 | C224 | N203 | 108.9(16) |
| C111 | N101 | O101 | 112.1(13) | C226 | C225 | N203 | 115.2(12) |
| C122 | N102 | C123 | 118.3(12) | F209 | C226 | F207 | 108.4(16) |
| C124 | N103 | C125 | 120.1(13) | F209 | C226 | F208 | 104.5(16) |
| F102 | C101 | F101 | 128(2)    | F207 | C226 | F208 | 101.8(13) |
| F102 | C101 | F103 | 95.2(17)  | F209 | C226 | C225 | 116.1(13) |
| F101 | C101 | F103 | 96.4(17)  | F207 | C226 | C225 | 112.6(14) |
| F102 | C101 | C102 | 118(2)    | F208 | C226 | C225 | 112.2(14) |

Table S9. Torsion Angles.

| A | B | C | D | Angle/° | A | B | C | D | Angle/° |
|---|---|---|---|---------|---|---|---|---|---------|
|---|---|---|---|---------|---|---|---|---|---------|



---

|      |      |      |      |            |      |      |      |      |            |
|------|------|------|------|------------|------|------|------|------|------------|
| C308 | O301 | N301 | C310 | -2(3)      | F101 | C101 | C102 | C107 | -135.8(19) |
| C351 | O351 | N351 | C353 | -10(2)     | F103 | C101 | C102 | C107 | -34(2)     |
| C367 | N353 | C023 | C325 | -87.2(15)  | C107 | C102 | C103 | C104 | -4(3)      |
| C306 | C301 | C302 | C303 | -0.1(8)    | C101 | C102 | C103 | C104 | 172.9(16)  |
| C101 | C301 | C302 | C303 | 179.0(4)   | C102 | C103 | C104 | C105 | 2(2)       |
| C301 | C302 | C303 | C304 | 1.1(8)     | C102 | C103 | C104 | C110 | -176.1(15) |
| C301 | C302 | C303 | C308 | 172.5(14)  | C103 | C104 | C105 | C106 | 0(2)       |
| C301 | C302 | C303 | C351 | -179.6(9)  | C110 | C104 | C105 | C106 | 178.2(15)  |
| C302 | C303 | C304 | C305 | -2.7(9)    | C104 | C105 | C106 | C107 | 0(2)       |
| C308 | C303 | C304 | C305 | -175.6(13) | C104 | C105 | C106 | C108 | 179.4(15)  |
| C351 | C303 | C304 | C305 | 178.0(10)  | C105 | C106 | C107 | C102 | -3(3)      |
| C303 | C304 | C305 | C306 | 3.3(9)     | C108 | C106 | C107 | C102 | 178.3(17)  |
| C303 | C304 | C305 | C307 | -176.4(7)  | C103 | C102 | C107 | C106 | 5(3)       |
| C302 | C301 | C306 | C305 | 0.7(9)     | C101 | C102 | C107 | C106 | -172.4(19) |
| C101 | C301 | C306 | C305 | -178.4(4)  | N101 | O101 | C108 | C110 | 12.6(13)   |
| C304 | C305 | C306 | C301 | -2.3(9)    | N101 | O101 | C108 | C109 | -101.7(12) |
| C307 | C305 | C306 | C301 | 177.5(6)   | N101 | O101 | C108 | C106 | 137.2(13)  |
| C306 | C305 | C307 | F303 | -71.0(11)  | C105 | C106 | C108 | O101 | 33(2)      |
| C304 | C305 | C307 | F303 | 108.7(10)  | C107 | C106 | C108 | O101 | -147.9(16) |
| C306 | C305 | C307 | F301 | 54.9(10)   | C105 | C106 | C108 | C110 | 150.0(15)  |
| C304 | C305 | C307 | F301 | -125.4(9)  | C107 | C106 | C108 | C110 | -31(2)     |
| C306 | C305 | C307 | F302 | 174.6(8)   | C105 | C106 | C108 | C109 | -85.3(18)  |
| C304 | C305 | C307 | F302 | -5.7(12)   | C107 | C106 | C108 | C109 | 93.8(18)   |
| C302 | C303 | C308 | C309 | 128(3)     | O101 | C108 | C109 | F104 | -179.9(12) |
| C304 | C303 | C308 | C309 | -60(3)     | C110 | C108 | C109 | F104 | 68.9(16)   |
| C351 | C303 | C308 | C309 | 101(7)     | C106 | C108 | C109 | F104 | -60.2(16)  |
| C302 | C303 | C308 | C326 | -83(2)     | O101 | C108 | C109 | F106 | 58.4(14)   |
| C304 | C303 | C308 | C326 | 89(2)      | C110 | C108 | C109 | F106 | -52.8(16)  |
| C351 | C303 | C308 | C326 | -109(8)    | C106 | C108 | C109 | F106 | 178.2(14)  |

---

---

|      |      |      |      |            |      |      |      |      |            |
|------|------|------|------|------------|------|------|------|------|------------|
| C302 | C303 | C308 | O301 | 28(2)      | O101 | C108 | C109 | F105 | -60.5(17)  |
| C304 | C303 | C308 | O301 | -159.7(13) | C110 | C108 | C109 | F105 | -171.8(15) |
| C351 | C303 | C308 | O301 | 1(5)       | C106 | C108 | C109 | F105 | 59.2(19)   |
| N301 | O301 | C308 | C309 | 17(2)      | O101 | C108 | C110 | C111 | -13.6(12)  |
| N301 | O301 | C308 | C326 | -105(2)    | C109 | C108 | C110 | C111 | 99.9(13)   |
| N301 | O301 | C308 | C303 | 139.5(18)  | C106 | C108 | C110 | C111 | -133.7(13) |
| C326 | C308 | C309 | C310 | 81(4)      | O101 | N101 | C111 | C112 | -178.4(13) |
| C303 | C308 | C309 | C310 | -132(2)    | O101 | N101 | C111 | C110 | -3.6(14)   |
| O301 | C308 | C309 | C310 | -28(3)     | C108 | C110 | C111 | N101 | 11.1(13)   |
| O301 | N301 | C310 | C309 | -14(3)     | C108 | C110 | C111 | C112 | -173.5(11) |
| O301 | N301 | C310 | C311 | -179(2)    | N101 | C111 | C112 | C113 | 161.0(14)  |
| C308 | C309 | C310 | N301 | 30(4)      | C110 | C111 | C112 | C113 | -13.6(17)  |
| C308 | C309 | C310 | C311 | -165(3)    | N101 | C111 | C112 | C117 | -18.0(19)  |
| N301 | C310 | C311 | C316 | 165(3)     | C110 | C111 | C112 | C117 | 167.4(11)  |
| C309 | C310 | C311 | C316 | 3(4)       | C117 | C112 | C113 | C114 | -4.6(19)   |
| N301 | C310 | C311 | C312 | -15(4)     | C111 | C112 | C113 | C114 | 176.5(12)  |
| C309 | C310 | C311 | C312 | -177(3)    | C112 | C113 | C114 | C115 | 8(2)       |
| C316 | C311 | C312 | C313 | -4(4)      | C113 | C114 | C115 | C116 | -8(2)      |
| C310 | C311 | C312 | C313 | 177(2)     | C113 | C114 | C115 | C122 | 176.9(14)  |
| C316 | C311 | C312 | C317 | -179(3)    | C114 | C115 | C116 | C121 | -177.0(12) |
| C310 | C311 | C312 | C317 | 2(4)       | C122 | C115 | C116 | C121 | -2(2)      |
| C311 | C312 | C313 | C320 | -178.3(19) | C114 | C115 | C116 | C117 | 6.5(19)    |
| C317 | C312 | C313 | C320 | -2(3)      | C122 | C115 | C116 | C117 | -178.8(13) |
| C311 | C312 | C313 | C314 | 7(3)       | C113 | C112 | C117 | C118 | -179.9(12) |
| C317 | C312 | C313 | C314 | -177.1(16) | C111 | C112 | C117 | C118 | -1.1(17)   |
| C320 | C313 | C314 | C315 | 179.1(13)  | C113 | C112 | C117 | C116 | 2.5(16)    |
| C312 | C313 | C314 | C315 | -6(2)      | C111 | C112 | C117 | C116 | -178.7(11) |
| C320 | C313 | C314 | C321 | -2(2)      | C115 | C116 | C117 | C118 | 178.7(11)  |
| C312 | C313 | C314 | C321 | 173.2(17)  | C121 | C116 | C117 | C118 | 2.0(15)    |

---

---

|      |      |      |      |            |      |      |      |      |            |
|------|------|------|------|------------|------|------|------|------|------------|
| C313 | C314 | C315 | C316 | 1.3(18)    | C115 | C116 | C117 | C112 | -3.5(17)   |
| C321 | C314 | C315 | C316 | -177.7(13) | C121 | C116 | C117 | C112 | 179.8(11)  |
| C312 | C311 | C316 | C315 | -1(3)      | C112 | C117 | C118 | C119 | 178.1(11)  |
| C310 | C311 | C316 | C315 | 178.4(18)  | C116 | C117 | C118 | C119 | -4.3(16)   |
| C314 | C315 | C316 | C311 | 2(2)       | C117 | C118 | C119 | C120 | 3.9(16)    |
| C313 | C312 | C317 | C318 | -2(3)      | C118 | C119 | C120 | C121 | -1.2(16)   |
| C311 | C312 | C317 | C318 | 174(3)     | C119 | C120 | C121 | C116 | -0.9(18)   |
| C312 | C317 | C318 | C319 | 4(5)       | C115 | C116 | C121 | C120 | -176.3(12) |
| C317 | C318 | C319 | C320 | -1(4)      | C117 | C116 | C121 | C120 | 0.4(18)    |
| C318 | C319 | C320 | C313 | -3(3)      | C123 | N102 | C122 | O102 | -10(2)     |
| C312 | C313 | C320 | C319 | 5(3)       | C123 | N102 | C122 | C115 | 177.8(12)  |
| C314 | C313 | C320 | C319 | 179.4(19)  | C114 | C115 | C122 | O102 | 120.7(15)  |
| C322 | N302 | C321 | O302 | -1(2)      | C116 | C115 | C122 | O102 | -54(2)     |
| C322 | N302 | C321 | C314 | 177.1(12)  | C114 | C115 | C122 | N102 | -67.0(17)  |
| C315 | C314 | C321 | O302 | 131(2)     | C116 | C115 | C122 | N102 | 118.4(15)  |
| C313 | C314 | C321 | O302 | -48(2)     | C122 | N102 | C123 | C124 | -59.2(18)  |
| C315 | C314 | C321 | N302 | -46.5(17)  | C125 | N103 | C124 | O103 | 3(2)       |
| C313 | C314 | C321 | N302 | 134.4(16)  | C125 | N103 | C124 | C123 | -171.9(13) |
| C321 | N302 | C322 | C323 | -67(2)     | N102 | C123 | C124 | O103 | -29(2)     |
| C368 | N303 | C323 | O303 | -23(4)     | N102 | C123 | C124 | N103 | 145.6(13)  |
| C368 | N303 | C323 | C322 | 163(2)     | C124 | N103 | C125 | C126 | 95(2)      |
| N302 | C322 | C323 | O303 | -40(3)     | N103 | C125 | C126 | F109 | -178.4(16) |
| N302 | C322 | C323 | N303 | 135(2)     | N103 | C125 | C126 | F107 | -54(2)     |
| N353 | C023 | C325 | F307 | 61.3(16)   | N103 | C125 | C126 | F108 | 59(2)      |
| N353 | C023 | C325 | F309 | -64.5(14)  | C208 | O201 | N201 | C211 | -12.4(16)  |
| N353 | C023 | C325 | F308 | 179.7(10)  | F202 | C201 | C202 | C207 | -169(3)    |
| C309 | C308 | C326 | F304 | -160(3)    | F201 | C201 | C202 | C207 | -36(3)     |
| C303 | C308 | C326 | F304 | 50(3)      | F203 | C201 | C202 | C207 | 83(3)      |
| O301 | C308 | C326 | F304 | -57(3)     | F202 | C201 | C202 | C203 | 15(4)      |

---

---

|      |      |      |      |            |      |      |      |      |            |
|------|------|------|------|------------|------|------|------|------|------------|
| C309 | C308 | C326 | F306 | 82(3)      | F201 | C201 | C202 | C203 | 148(2)     |
| C303 | C308 | C326 | F306 | -68(2)     | F203 | C201 | C202 | C203 | -93(3)     |
| O301 | C308 | C326 | F306 | -175.6(18) | C207 | C202 | C203 | C204 | 4(3)       |
| C309 | C308 | C326 | F305 | -39(4)     | C201 | C202 | C203 | C204 | -180(2)    |
| C303 | C308 | C326 | F305 | 171(2)     | C202 | C203 | C204 | C205 | -4(3)      |
| O301 | C308 | C326 | F305 | 64(3)      | C202 | C203 | C204 | Cl20 | -178.7(18) |
| N351 | O351 | C351 | C354 | -98.9(16)  | C203 | C204 | C205 | C206 | 2(3)       |
| N351 | O351 | C351 | C303 | 142.0(15)  | Cl20 | C204 | C205 | C206 | 176(2)     |
| N351 | O351 | C351 | C352 | 14(2)      | C204 | C205 | C206 | C207 | 0(3)       |
| C302 | C303 | C351 | O351 | 32.9(17)   | C204 | C205 | C206 | C208 | -178(2)    |
| C304 | C303 | C351 | O351 | -147.8(11) | C203 | C202 | C207 | C206 | -2(3)      |
| C308 | C303 | C351 | O351 | -170(8)    | C201 | C202 | C207 | C206 | -178(2)    |
| C302 | C303 | C351 | C354 | -84.2(12)  | C205 | C206 | C207 | C202 | 0(3)       |
| C304 | C303 | C351 | C354 | 95.1(13)   | C208 | C206 | C207 | C202 | 178(2)     |
| C308 | C303 | C351 | C354 | 73(6)      | C207 | C206 | C208 | O201 | -148(2)    |
| C302 | C303 | C351 | C352 | 158.4(14)  | C205 | C206 | C208 | O201 | 30(2)      |
| C304 | C303 | C351 | C352 | -22(2)     | C207 | C206 | C208 | C209 | 97(2)      |
| C308 | C303 | C351 | C352 | -44(6)     | C205 | C206 | C208 | C209 | -85(2)     |
| O351 | C351 | C352 | C353 | -11(2)     | C207 | C206 | C208 | C210 | -30(3)     |
| C354 | C351 | C352 | C353 | 101.5(16)  | C205 | C206 | C208 | C210 | 147.9(19)  |
| C303 | C351 | C352 | C353 | -139.3(15) | N201 | O201 | C208 | C206 | 144.0(16)  |
| O351 | N351 | C353 | C355 | 175(2)     | N201 | O201 | C208 | C209 | -98.2(15)  |
| O351 | N351 | C353 | C352 | 1(3)       | N201 | O201 | C208 | C210 | 19.9(14)   |
| C351 | C352 | C353 | N351 | 6(2)       | C206 | C208 | C209 | F206 | -176(2)    |
| C351 | C352 | C353 | C355 | -168.4(19) | O201 | C208 | C209 | F206 | 66(2)      |
| O351 | C351 | C354 | F353 | -58.9(16)  | C210 | C208 | C209 | F206 | -47(3)     |
| C303 | C351 | C354 | F353 | 63.5(15)   | C206 | C208 | C209 | F205 | 59(2)      |
| C352 | C351 | C354 | F353 | -174.0(17) | O201 | C208 | C209 | F205 | -59(2)     |
| O351 | C351 | C354 | F352 | 63.4(17)   | C210 | C208 | C209 | F205 | -171.6(19) |

---

---

|      |      |      |      |            |      |      |      |      |            |
|------|------|------|------|------------|------|------|------|------|------------|
| C303 | C351 | C354 | F352 | -174.1(11) | C206 | C208 | C209 | F204 | -58(2)     |
| C352 | C351 | C354 | F352 | -51.6(19)  | O201 | C208 | C209 | F204 | -176.1(15) |
| O351 | C351 | C354 | F351 | -178.8(14) | C210 | C208 | C209 | F204 | 71.2(18)   |
| C303 | C351 | C354 | F351 | -56.4(16)  | C206 | C208 | C210 | C211 | -139.2(17) |
| C352 | C351 | C354 | F351 | 66.1(19)   | O201 | C208 | C210 | C211 | -18.4(13)  |
| N351 | C353 | C355 | C364 | 175(2)     | C209 | C208 | C210 | C211 | 94.6(16)   |
| C352 | C353 | C355 | C364 | -10(3)     | O201 | N201 | C211 | C212 | 179.4(14)  |
| N351 | C353 | C355 | C356 | -4(3)      | O201 | N201 | C211 | C210 | -0.7(17)   |
| C352 | C353 | C355 | C356 | 171(2)     | C208 | C210 | C211 | N201 | 12.6(16)   |
| C364 | C355 | C356 | C357 | 178(2)     | C208 | C210 | C211 | C212 | -167.5(14) |
| C353 | C355 | C356 | C357 | -3(3)      | N201 | C211 | C212 | C213 | 170.3(15)  |
| C364 | C355 | C356 | C361 | 5(3)       | C210 | C211 | C212 | C213 | -10(2)     |
| C353 | C355 | C356 | C361 | -175.8(19) | N201 | C211 | C212 | C217 | -11(2)     |
| C355 | C356 | C357 | C358 | -178.7(19) | C210 | C211 | C212 | C217 | 169.2(14)  |
| C361 | C356 | C357 | C358 | -6(3)      | C217 | C212 | C213 | C214 | -1(2)      |
| C356 | C357 | C358 | C359 | 0(3)       | C211 | C212 | C213 | C214 | 177.9(14)  |
| C357 | C358 | C359 | C360 | 4(3)       | C212 | C213 | C214 | C215 | 1(2)       |
| C358 | C359 | C360 | C361 | -2(3)      | C213 | C214 | C215 | C216 | 2(2)       |
| C359 | C360 | C361 | C362 | -173.4(17) | C213 | C214 | C215 | C222 | -175.2(13) |
| C359 | C360 | C361 | C356 | -3(2)      | C214 | C215 | C216 | C217 | -5(2)      |
| C357 | C356 | C361 | C360 | 8(3)       | C222 | C215 | C216 | C217 | 172.4(14)  |
| C355 | C356 | C361 | C360 | -179.5(17) | C214 | C215 | C216 | C221 | 176.3(14)  |
| C357 | C356 | C361 | C362 | 178.5(17)  | C222 | C215 | C216 | C221 | -7(2)      |
| C355 | C356 | C361 | C362 | -9(3)      | C215 | C216 | C217 | C218 | -178.1(13) |
| C360 | C361 | C362 | C363 | 175.1(14)  | C221 | C216 | C217 | C218 | 1(2)       |
| C356 | C361 | C362 | C363 | 5(2)       | C215 | C216 | C217 | C212 | 4(2)       |
| C360 | C361 | C362 | C365 | -5(2)      | C221 | C216 | C217 | C212 | -176.5(13) |
| C356 | C361 | C362 | C365 | -174.8(16) | C213 | C212 | C217 | C216 | -2(2)      |
| C361 | C362 | C363 | C364 | 2(2)       | C211 | C212 | C217 | C216 | 179.6(15)  |

---

|      |      |      |      |            |      |      |      |      |            |
|------|------|------|------|------------|------|------|------|------|------------|
| C365 | C362 | C363 | C364 | -177.8(15) | C213 | C212 | C217 | C218 | -179.0(14) |
| C362 | C363 | C364 | C355 | -6(2)      | C211 | C212 | C217 | C218 | 2(2)       |
| C356 | C355 | C364 | C363 | 2(3)       | C216 | C217 | C218 | C219 | 0(2)       |
| C353 | C355 | C364 | C363 | -177.1(17) | C212 | C217 | C218 | C219 | 177.5(15)  |
| C366 | N352 | C365 | O352 | -5.1(19)   | C217 | C218 | C219 | C220 | 0(2)       |
| C366 | N352 | C365 | C362 | 177.6(11)  | C218 | C219 | C220 | C221 | -1(2)      |
| C363 | C362 | C365 | O352 | 132.9(13)  | C219 | C220 | C221 | C216 | 2(2)       |
| C361 | C362 | C365 | O352 | -47(2)     | C217 | C216 | C221 | C220 | -2(2)      |
| C363 | C362 | C365 | N352 | -49.9(18)  | C215 | C216 | C221 | C220 | 177.2(14)  |
| C361 | C362 | C365 | N352 | 130.3(13)  | C223 | N202 | C222 | O202 | 4(3)       |
| C365 | N352 | C366 | C367 | -72.5(13)  | C223 | N202 | C222 | C215 | 178.0(17)  |
| C023 | N353 | C367 | O353 | -6.9(18)   | C214 | C215 | C222 | O202 | 129(2)     |
| C023 | N353 | C367 | C366 | 175.0(12)  | C216 | C215 | C222 | O202 | -48(3)     |
| N352 | C366 | C367 | O353 | -25.2(15)  | C214 | C215 | C222 | N202 | -45(2)     |
| N352 | C366 | C367 | N353 | 152.9(10)  | C216 | C215 | C222 | N202 | 138.1(17)  |
| C323 | N303 | C368 | C369 | 116(2)     | C222 | N202 | C223 | C224 | -92(2)     |
| N303 | C368 | C369 | F354 | -58(3)     | N202 | C223 | C224 | O203 | -15(3)     |
| N303 | C368 | C369 | F355 | 178(2)     | N202 | C223 | C224 | N203 | 162.8(16)  |
| N303 | C368 | C369 | F356 | 65(2)      | C225 | N203 | C224 | C223 | -163.6(19) |
| C108 | O101 | N101 | C111 | -6.3(14)   | C225 | N203 | C224 | O203 | 14(3)      |
| F102 | C101 | C102 | C103 | -106(2)    | C224 | N203 | C225 | C226 | 93.8(19)   |
| F101 | C101 | C102 | C103 | 47(2)      | N203 | C225 | C226 | F209 | 51.8(17)   |
| F103 | C101 | C102 | C103 | 148.9(18)  | N203 | C225 | C226 | F207 | -74.1(15)  |
| F102 | C101 | C102 | C107 | 71(3)      | N203 | C225 | C226 | F208 | 171.9(11)  |

Table S10. Hydrogen Atom Coordinates ( $\text{\AA}\times 10^4$ ) and Isotropic Displacement Parameters ( $\text{\AA}^2\times 10^3$ ).

| Atom | x    | y    | z    | U(eq) |
|------|------|------|------|-------|
| H30A | 3840 | 2466 | 8108 | 65    |

---

|      |       |      |       |     |
|------|-------|------|-------|-----|
| H303 | 7401  | 2888 | 6453  | 109 |
| H352 | 4312  | 2339 | 7850  | 57  |
| H353 | 7958  | 2848 | 6416  | 61  |
| H02A | 10350 | 2849 | 6593  | 84  |
| H02B | 10215 | 2662 | 7451  | 84  |
| H302 | -597  | 215  | 10757 | 81  |
| H304 | 2044  | 999  | 11780 | 94  |
| H306 | -1509 | 577  | 12991 | 90  |
| H30B | 1433  | 1145 | 10315 | 68  |
| H30C | 3277  | 1076 | 10413 | 68  |
| H315 | 4711  | 2051 | 9046  | 74  |
| H316 | 3564  | 1559 | 9777  | 77  |
| H317 | 1763  | 723  | 7625  | 78  |
| H318 | 1515  | 776  | 6307  | 90  |
| H319 | 2419  | 1232 | 5611  | 80  |
| H320 | 3651  | 1699 | 6363  | 78  |
| H32A | 4607  | 2980 | 7618  | 78  |
| H32B | 4909  | 2772 | 6801  | 78  |
| H35A | 2222  | 1187 | 10453 | 71  |
| H35B | 3785  | 955  | 10298 | 71  |
| H357 | 1233  | 724  | 7771  | 46  |
| H358 | 1005  | 695  | 6330  | 48  |
| H359 | 2198  | 1119 | 5548  | 56  |
| H360 | 3887  | 1548 | 6168  | 54  |
| H363 | 5075  | 1912 | 8846  | 63  |
| H364 | 3952  | 1475 | 9613  | 61  |
| H36A | 5177  | 2821 | 7254  | 53  |
| H36B | 5652  | 2570 | 6528  | 53  |
| H36C | 9757  | 3058 | 7701  | 146 |

---

---

|      |       |      |      |     |
|------|-------|------|------|-----|
| H36D | 9590  | 3277 | 6851 | 146 |
| H102 | 4049  | 2497 | 4156 | 81  |
| H103 | 7700  | 1868 | 5649 | 97  |
| H10A | -1521 | 4522 | -713 | 68  |
| H105 | -773  | 4821 | 1690 | 57  |
| H107 | 2214  | 4145 | 659  | 69  |
| H11A | 2306  | 3908 | 1921 | 56  |
| H11B | 3863  | 4127 | 2237 | 56  |
| H113 | 3826  | 3504 | 2564 | 59  |
| H114 | 5314  | 3049 | 3193 | 66  |
| H118 | 1881  | 4146 | 4702 | 57  |
| H119 | 1722  | 4063 | 6058 | 56  |
| H120 | 3073  | 3568 | 6706 | 61  |
| H121 | 4403  | 3172 | 5946 | 69  |
| H12A | 5027  | 1976 | 4586 | 92  |
| H12B | 5568  | 2180 | 5405 | 92  |
| H12C | 10193 | 1686 | 5419 | 117 |
| H12D | 10110 | 1928 | 4628 | 117 |
| H202 | 4558  | 2622 | 4032 | 87  |
| H20A | 8473  | 1902 | 5106 | 113 |
| H203 | -2100 | 4622 | -646 | 63  |
| H205 | -1044 | 4899 | 1667 | 65  |
| H207 | 1773  | 4190 | 588  | 59  |
| H21A | 1664  | 3949 | 1861 | 51  |
| H21B | 3321  | 4142 | 2118 | 51  |
| H213 | 3430  | 3589 | 2635 | 57  |
| H214 | 4832  | 3128 | 3309 | 63  |
| H218 | 1269  | 4235 | 4664 | 65  |
| H219 | 1179  | 4179 | 6055 | 69  |

---



|      |       |      |      |     |
|------|-------|------|------|-----|
| H220 | 2486  | 3706 | 6680 | 69  |
| H221 | 3771  | 3291 | 6047 | 71  |
| H22A | 6344  | 2355 | 5325 | 85  |
| H22B | 5480  | 2121 | 4619 | 85  |
| H22C | 10773 | 1760 | 4667 | 124 |
| H22D | 10663 | 2096 | 4067 | 124 |

Table S11. Atomic Occupancy.

| Atom | Occupancy | Atom | Occupancy | Atom | Occupancy |
|------|-----------|------|-----------|------|-----------|
| F304 | 0.45      | F305 | 0.45      | F306 | 0.45      |
| F307 | 0.55      | F308 | 0.55      | F309 | 0.55      |
| F351 | 0.55      | F352 | 0.55      | F353 | 0.55      |
| F354 | 0.45      | F355 | 0.45      | F356 | 0.45      |
| O301 | 0.45      | O302 | 0.45      | O303 | 0.45      |
| O351 | 0.55      | O352 | 0.55      | O353 | 0.55      |
| N301 | 0.45      | N302 | 0.45      | H30A | 0.45      |
| N303 | 0.45      | H303 | 0.45      | N351 | 0.55      |
| N352 | 0.55      | H352 | 0.55      | N353 | 0.55      |
| H353 | 0.55      | C023 | 0.55      | H02A | 0.55      |
| H02B | 0.55      | C308 | 0.45      | C309 | 0.45      |
| H30B | 0.45      | H30C | 0.45      | C310 | 0.45      |
| C311 | 0.45      | C312 | 0.45      | C313 | 0.45      |
| C314 | 0.45      | C315 | 0.45      | H315 | 0.45      |
| C316 | 0.45      | H316 | 0.45      | C317 | 0.45      |
| H317 | 0.45      | C318 | 0.45      | H318 | 0.45      |
| C319 | 0.45      | H319 | 0.45      | C320 | 0.45      |
| H320 | 0.45      | C321 | 0.45      | C322 | 0.45      |
| H32A | 0.45      | H32B | 0.45      | C323 | 0.45      |
| C325 | 0.55      | C326 | 0.45      | C351 | 0.55      |

---

|      |      |      |      |      |      |
|------|------|------|------|------|------|
| C352 | 0.55 | H35A | 0.55 | H35B | 0.55 |
| C353 | 0.55 | C354 | 0.55 | C355 | 0.55 |
| C356 | 0.55 | C357 | 0.55 | H357 | 0.55 |
| C358 | 0.55 | H358 | 0.55 | C359 | 0.55 |
| H359 | 0.55 | C360 | 0.55 | H360 | 0.55 |
| C361 | 0.55 | C362 | 0.55 | C363 | 0.55 |
| H363 | 0.55 | C364 | 0.55 | H364 | 0.55 |
| C365 | 0.55 | C366 | 0.55 | H36A | 0.55 |
| H36B | 0.55 | C367 | 0.55 | C368 | 0.45 |
| H36C | 0.45 | H36D | 0.45 | C369 | 0.45 |
| C110 | 0.55 | F101 | 0.55 | F102 | 0.55 |
| F103 | 0.55 | F104 | 0.55 | F105 | 0.55 |
| F106 | 0.55 | F107 | 0.55 | F108 | 0.55 |
| F109 | 0.55 | O101 | 0.55 | O102 | 0.55 |
| O103 | 0.55 | N101 | 0.55 | N102 | 0.55 |
| H102 | 0.55 | N103 | 0.55 | H103 | 0.55 |
| C101 | 0.55 | C102 | 0.55 | C103 | 0.55 |
| H10A | 0.55 | C104 | 0.55 | C105 | 0.55 |
| H105 | 0.55 | C106 | 0.55 | C107 | 0.55 |
| H107 | 0.55 | C108 | 0.55 | C109 | 0.55 |
| C110 | 0.55 | H11A | 0.55 | H11B | 0.55 |
| C111 | 0.55 | C112 | 0.55 | C113 | 0.55 |
| H113 | 0.55 | C114 | 0.55 | H114 | 0.55 |
| C115 | 0.55 | C116 | 0.55 | C117 | 0.55 |
| C118 | 0.55 | H118 | 0.55 | C119 | 0.55 |
| H119 | 0.55 | C120 | 0.55 | H120 | 0.55 |
| C121 | 0.55 | H121 | 0.55 | C122 | 0.55 |
| C123 | 0.55 | H12A | 0.55 | H12B | 0.55 |
| C124 | 0.55 | C125 | 0.55 | H12C | 0.55 |

---

---

|      |      |      |      |      |      |
|------|------|------|------|------|------|
| H12D | 0.55 | C126 | 0.55 | C120 | 0.45 |
| F201 | 0.45 | F202 | 0.45 | F203 | 0.45 |
| F204 | 0.45 | F205 | 0.45 | F206 | 0.45 |
| F207 | 0.45 | F208 | 0.45 | F209 | 0.45 |
| O201 | 0.45 | O202 | 0.45 | O203 | 0.45 |
| N201 | 0.45 | N202 | 0.45 | H202 | 0.45 |
| N203 | 0.45 | H20A | 0.45 | C201 | 0.45 |
| C202 | 0.45 | C203 | 0.45 | H203 | 0.45 |
| C204 | 0.45 | C205 | 0.45 | H205 | 0.45 |
| C206 | 0.45 | C207 | 0.45 | H207 | 0.45 |
| C208 | 0.45 | C209 | 0.45 | C210 | 0.45 |
| H21A | 0.45 | H21B | 0.45 | C211 | 0.45 |
| C212 | 0.45 | C213 | 0.45 | H213 | 0.45 |
| C214 | 0.45 | H214 | 0.45 | C215 | 0.45 |
| C216 | 0.45 | C217 | 0.45 | C218 | 0.45 |
| H218 | 0.45 | C219 | 0.45 | H219 | 0.45 |
| C220 | 0.45 | H220 | 0.45 | C221 | 0.45 |
| H221 | 0.45 | C222 | 0.45 | C223 | 0.45 |
| H22A | 0.45 | H22B | 0.45 | C224 | 0.45 |
| C225 | 0.45 | H22C | 0.45 | H22D | 0.45 |
| C226 | 0.45 | O1   | 0.45 | O2   | 0.55 |

---
